1 **Title:** Boreal forests will be more severely affected by projected anthropogenic climate  
2 forcing than mixedwood and northern hardwood forests in eastern Canada.

3

4 **Authors:** Yan Boulanger<sup>1\*</sup>, Jesus Pascual Puigdevall<sup>1</sup>

5 <sup>1</sup>Natural Resources Canada, Canadian Forest Service, Laurentian Forestry Centre,  
6 Québec, QC, Canada

7

8 **\*corresponding author** Yan Boulanger, Email : [yan.boulanger@canada.ca](mailto:yan.boulanger@canada.ca); Phone:  
9 (418) 648-5834

10 **Abstract**

11 **Context**

12 Increased anthropogenic climate forcing is projected to have tremendous impacts on  
13 global forest ecosystems, with northern biomes being more at risk.

14 **Objectives**

15 To model the impacts of harvest and increased anthropogenic climate forcing on eastern  
16 Canada's forest landscapes and to assess the strong spatial heterogeneity in the severity,  
17 the nature and direction of the impacts expected within northern forest regions.

18 **Methods**

19 We used LANDIS-II to project species-specific aboveground biomass (AGB) between  
20 2020 and 2150 under three climate (baseline, RCP 4.5 and RCP 8.5) and two harvest  
21 (baseline harvest, no harvest) scenarios within four forest regions (boreal west, boreal  
22 east, mixedwood and northern hardwood).

23 **Results**

24 Climate change impacts within the boreal forest regions would mainly result from  
25 increases in wildfires activity which will strongly alter total AGB. In the mixedwood and  
26 northern hardwood, changes will be less important and will result from climate-induced  
27 growth constraints that will alter species composition towards more thermophilous  
28 species. Climate-induced impacts were much more important and swifter under RCP 8.5  
29 after 2080 suggesting that eastern Canada's forests might cross important tipping points  
30 under strong anthropogenic climate forcing.

31 **Conclusions**

32 Boreal forest regions will be much less resilient than mixedwood or northern hardwoods  
33 to the projected changes in climate regimes. Current harvest strategies will interact with  
34 anthropogenic climate forcing to further modify forest landscapes, notably by  
35 accelerating thermophilous species AGB gain in southernmost regions. Major changes to  
36 harvest practices are strongly needed to preserve the long-term sustainability of wood  
37 supply in eastern Canada. Adaptation strategies should be region-specific.

38 **Keywords**

39 Climate change, Harvest, Landis-II, boreal forests, mixedwood, northern hardwood,  
40 eastern Canada

41

## 42 **Introduction**

43 Increased anthropogenic climate forcing is projected to have tremendous impacts on  
44 global forest ecosystems (Heyder et al. 2011). Changes in temperature and precipitation  
45 regimes since the last decades have already modified natural disturbances as well as  
46 forest productivity in several forest regions worldwide. Among all forest biomes,  
47 northern forests will probably be among the most impacted by climate change, with  
48 temperatures projected to increase at much higher rates than elsewhere (Price et al. 2013).  
49 In Canada, temperatures have already risen by 1.7 °C since 1948, a rate twice as fast as  
50 the global average (NRCan 2019). During this time period, wildfire activity has  
51 significantly increased (Hanes et al. 2019), boreal tree species productivity have declined  
52 (Girardin et al. 2016) while warmer temperatures might be responsible for recent  
53 modifications in forest insect outbreak regimes (Pureswaran et al. 2015). Tipping points  
54 are likely to be crossed under aggressive anthropogenic climate forcing (e.g., RCP 8.5)  
55 potentially resulting in biome shifts (Stralberg et al. 2018). No doubt that these alterations  
56 of northern forest ecosystems will severely impact ecosystem services including carbon  
57 storage (Kurz et al. 2008), timber supply (Gauthier et al. 2015; Boucher et al. 2019;  
58 Brecka et al. 2020) and wildlife habitats (Tremblay et al. 2018; Cadieux et al. 2019,  
59 2020).

60 Although alterations of northern forest ecosystems are projected to be significant, strong  
61 spatial heterogeneity in the severity, the nature and direction of the impacts is to be  
62 expected. Such heterogeneity would likely result from the complex interactions between  
63 climate change and natural and anthropogenic disturbances, forest productivity, seed  
64 dispersal and biophysical variables (e.g., soil conditions). Disturbance severity and types

65 strongly vary across the temperate to the boreal forest biomes and as such, are likely to  
66 differently impact successional pathways, notably when interacting with climate change.  
67 For instance, annual burned area is projected to strongly increase in central and western  
68 Canadian boreal forests when compared to eastern boreal forests (Boulanger et al. 2014),  
69 resulting in different impacts on productivity, biomass accumulation and successional  
70 pathways (Boulanger et al. 2016; Cadieux et al. 2019). Moderate and potentially selective  
71 disturbances (e.g., host-selective insect outbreaks) occurring at the temperate-boreal  
72 ecotone could favor transitions to temperate forests while climate-induced increases in  
73 severe stand-replacing disturbances would promote either transient or permanent  
74 transitions to pioneer states within the boreal forest (Payette and Delwaite 2003,  
75 Johnstone et al. 2016; Brice et al. 2020). Important modifications in species composition  
76 are to be expected at the transition zones between boreal and temperate biomes where  
77 several tree species are currently reaching either their southward or northward thermal  
78 tolerance (Leithead et al. 2010; Brice et al. 2019). On one hand, one could expect that  
79 projected increases in temperatures might favor the northward migration of e.g.,  
80 thermophilous hardwood species at the expense of boreal conifers, leading to a slow but  
81 steady northward progression of the northern hardwood forest region either through  
82 increased recruitment or better growth conditions (Duveneck et al. 2014 ). On the other  
83 hand, more suitable growth conditions as projected in the short-term or under mild  
84 climate forcing (D'Orangeville et al. 2018) could favor boreal species productivity in  
85 northern locations leading to faster and larger biomass accumulation as well as to closed-  
86 crown forest encroachment in sites where productivity is currently climate-limited.  
87 Despite suitable recruitment and growth conditions, propagule availability might restrain

88 the expansion of warmed adapted species, making virtually impossible for these species  
89 to keep pace with the northward displacement of isotherms which would introduce a  
90 migration lag in the southernmost part of the boreal forest (Sittaro et al. 2017; Taylor et  
91 al. 2017). Furthermore, unsuitable, acidic soil conditions within the boreal forest could  
92 also restrain the northward expansion of hardwood species (Brown and Velland 2014)  
93 although recent analyses showed that soil characteristics represent a rather minor  
94 impediment to such transitions (Brice et al. 2020). Yet, it is still unknown how these  
95 agents of change will ultimately cumulate and interact at multiple spatial and temporal  
96 scales to alter forest landscapes over areas experiencing distinct current and future  
97 environmental conditions.

98 In commercial forests, anthropogenic impacts such as harvest are likely to cumulate with  
99 climate change to further modify forest ecosystems (Boulanger et al. 2016; Cadieux  
100 2019). Harvest-induced increases in disturbance rates might modify the system's inertia  
101 and accelerate climate-induced changes by removing resident communities and providing  
102 resources for warmed-adapted establishment and growth (Steenberg et al. 2013; Brice et  
103 al. 2020). Indeed, it was shown that alike canopy gaps (Leithead et al. 2010), moderate  
104 harvest-induced disturbance rates under warmer temperatures could favor co-occurring  
105 thermophilous pioneer but also shade-tolerant species, and hasten their northward  
106 migration within the boreal forest (Steenberg et al. 2013; Brice et al. 2019, 2020; Mina et  
107 al. 2020). When cumulated with increasing natural disturbance rates, harvest could bring  
108 total disturbance rates outside their range of natural variability (Bergeron et al. 2006; Cyr  
109 et al. 2009), resulting in regeneration failures and long-term changes in successional  
110 pathways (Splawinski et al. 2019). By favoring structural and compositional diversities,

111 ecosystem-based forest management was suggested to promote forest resilience under  
112 increasing climate warming (Duveneck et al. 2014, 2015a; Boulanger et al. 2019). Still,  
113 this business-as-usual strategy that is now extensively applied throughout northern forests  
114 might not be efficient in order to keep or restore functional diversity under climate  
115 change (Boulanger et al. 2019; Mina et al. 2020). It has to be assessed how such a  
116 strategy might interact with climate-induced changes and how it could affect forest inertia  
117 within different forest ecosystems that will experience contrasting disturbance- and  
118 climate regime changes. In this context, quantifying the effects as well as the importance  
119 of harvest-induced impacts relative to those generated by climate change over different  
120 forest regions should offer new insights about potential adaptation avenues (Messier et al.  
121 2019).

122 Evaluating the spatial heterogeneity of future climate- and harvest-induced changes in  
123 forest ecosystems is paramount in order to understand how specific drivers of forest  
124 changes are projected to proceed. Furthermore, estimating the rate and nature of the shifts  
125 as well as their overall impacts on harvest would help identify efficient and specific  
126 adaptation measures, notably to ensure the continuous provision of forest ecosystem  
127 services. Harvest and anthropogenic climate interactions on forest landscapes might be  
128 realistically projected using spatially-explicit process-based model simulations. Forest  
129 landscape models (FLM) were proven successful in order to project future changes in  
130 forest composition and structure according to different climate and harvest scenarios  
131 (e.g., Scheller and Mladenoff 2008; Steenberg et al. 2013; Duveneck et al. 2015a, 2015b,  
132 Boulanger et al. 2019). Yet, FLM simulations are frequently conducted over territories  
133 spanning less than 10M ha (with few notable exceptions, see Wang et al. 2014) which

134 impeded the consideration of the heterogeneity in climate- and harvest- induced changes  
135 over a wide range of environmental conditions.

136 In this study, we modeled the impacts of harvest and increased anthropogenic climate  
137 forcing on the entire commercial forest (54.3M ha) of Quebec, Canada by using the  
138 LANDIS-II FLM. Simulations were conducted in four forest regions (northern hardwood,  
139 mixedwood, boreal east and boreal west) in eastern Canada and covered one of the  
140 largest area ever simulated with a FLM. More specifically, our objectives were to i)  
141 assess how and how much forest landscapes in each of these forest regions will be  
142 specifically altered under different climate scenarios. Furthermore, ii) we explored how  
143 harvest in the context of climate change, might differently affect forest inertia and the  
144 nature of changes projected within those forest regions. We hypothesized that i) climate  
145 change will severely altered forest landscapes with large changes driven by fire in the  
146 boreal forest regions while changes in productivity will favored hardwoods over  
147 coniferous species especially in the mixedwood region. Also ii) harvest will accelerate  
148 climate induced-changes by favoring species turnover.

## 149 **2. Methods**

### 150 **2.1 Study regions**

151 We projected forest landscapes over the entire commercial forest in the province of  
152 Québec (54.3 M ha, Figure 1). The area is bordered on the southeast by the northern  
153 extent of the Appalachian Mountains. In this area, valleys covered by glacial till and  
154 humo-ferric podzols are intermingled with broadly rolling mosaic of upland plateaus  
155 sitting between 200 and 800 m above sea level. Most of the area located north of the St.



156 Lawrence River belongs to the Canadian Shield. Landform and soils in this area are  
157 dominated by uplands and wetlands, where Precambrian granitic bedrock outcrops  
158 alternate with ridges encompassing coarse texture hummocky deposits of glacial origin.  
159 Climate is more typical of the temperate continental region in the southernmost part of  
160 the study area, whereas the northernmost part is typical of boreal regions. The study area  
161 covers wide latitudinal and longitudinal temperature gradients (mean annual temperature  
162 south MAT = 6.6°C; north MAT = -3.1°C and total annual precipitations west TAP = 600  
163 mm; east TAP = 1200 mm, Robitaille and Saucier [1998]). A wide variety of forest  
164 ecosystems occur within the area and as such, the study area was divided in four forest  
165 regions based on the Quebec's bioclimatic subdomains, i.e., the northern hardwoods, the  
166 mixedwoods as well as the boreal east and boreal west (Robitaille and Saucier 1998).  
167 Species-rich northern hardwood forests dominated by deciduous mesophytic species are  
168 located in the southern part of the study area. Forest gradually transitions to mixed in the  
169 mixedwood forest region and finally to conifer-dominated forests with increasing latitude  
170 in both boreal forest regions. Recurrent spruce budworm (SBW) outbreaks are the most  
171 important natural disturbance in the mixedwood forest region (Boulanger et al. 2012),  
172 and small windthrows and single-tree mortality drive natural forest succession in the  
173 northern hardwood forest region. Wildfires are most prevalent within the boreal portion  
174 of the study area with fire return intervals decreasing from *ca* 400 years in the east to *ca*  
175 100 years in the drier, western part (Boulanger et al. 2014). Timber harvest occurs at  
176 various rates over the entire study area, with cutblock size and proportion of biomass  
177 harvested typically increasing with latitude. Single-tree and small-patch harvest are most  
178 prevalent in the northern hardwoods, whereas clearcuts reaching more than 100 ha are

179 more common in the boreal regions. These prescriptions follows ecosystem-based forest  
180 management guidelines and aim at emulate natural disturbances in each of these regions.

## 181 **2.2 Climate data**

182 We produced monthly time series for baseline climate by interpolating data from climate  
183 station records (McKenney et al. 2013). We obtained future climate projections from the  
184 Canadian Earth System Model version 2 (CanESM2) for each of two different radiative  
185 forcing scenarios, i.e. RCP 4.5 and RCP 8.5. Radiative forcing is assumed to stabilize at  
186  $4.5 \text{ W}\cdot\text{m}^{-2}$  after 2100 in the RCP 4.5 scenario, without an “overshoot” pathway. In the  
187 RCP 8.5 scenario, the forcing reaches  $8.5 \text{ W}\cdot\text{m}^{-2}$  in 2100 and keeps on increasing  
188 afterwards. Under these scenarios, the CanESM2 projects mean annual temperature  
189 increases of ca  $3.9^\circ\text{C}$  (RCP 4.5) to ca  $8.5^\circ\text{C}$  (RCP 8.5) throughout the study area by 2100  
190 (compared to circa 2000), while average precipitation is projected to increase by 7%  
191 (RCP 8.5) to 10% (RCP 4.5). We bias-corrected data from CanESM2 for the 1900 - 2100  
192 period by expressing temperatures as differences and precipitations as ratios relative to  
193 the CanESM2 monthly means for the 1961-1990 period.

## 194 **2.3 LANDIS-II forest landscape simulation model**

195 LANDIS-II is a spatially-explicit raster-based forest landscape model that simulates  
196 disturbances, seed dispersal, and forest succession (Scheller et al. 2007). Species are  
197 defined using unique life-history attributes and are represented in each grid cell as 10-  
198 year age-cohorts. Forest composition and structure in each cell were initialized using  
199 provincial ecoforestry maps and cohort data from provincial permanent and temporary  
200 forest inventory plots (FIP). These maps were rasterized at a 250-m (6.25 ha) resolution.  
201 Each of these cells was then assigned to a spatial unit (i.e., “landtype”) with

202 homogeneous soil and climate conditions. Grid cells with more than 50% of their area  
203 covered with non-forest cover types were classified as inactive.

#### 204 **2.4 Forest succession and species growth potential**

205 We used the LANDIS-II Biomass Succession extension v 3.2 (Scheller and Mladenoff  
206 2004) to simulate forest succession in each 250-m cell. This extension simulates  
207 modifications in cohort aboveground biomass (AGB) over time by taking into  
208 consideration tree species' cohort age, life-history traits, and species-specific landtype  
209 responses (Suppl. Mat. S1). We used species' life-history traits information collected  
210 from various sources including several previous LANDIS-II publications conducted for  
211 North American forest landscapes. Species were classified as either thermophilous or  
212 boreal according to their thermal preference in growing degree-days (Suppl. Mat. S1).  
213 We also classified species according to which successional stage, e.g., either pioneer or  
214 mid-/late-successional, they are mostly associated consistent with their shade tolerance  
215 and longevity.

216 We parameterized and calibrated three sets of dynamics inputs sensitive to soil and  
217 climate conditions, i.e., i) species establishment probabilities (*SEP*), ii) maximum  
218 possible aboveground net primary productivity (*maxANPP*), and iii) maximum  
219 aboveground biomass (*maxAGB*). Parameterization was conducted using the individual  
220 tree-based, forest patch model PICUS version 1.5 (Lexer and Honninger 2001; Taylor et  
221 al. 2017). PICUS simulates the dynamics of individual trees on 10×10 m patches across  
222 forest stand areas and accounts for spatially-explicit interactions among patches via a 3D  
223 light module. PICUS simulates the effects of climate and soil properties on tree  
224 population dynamics (Lexer and Honninger 2001). Using individual tree species

225 parameters, we ran PICUS simulations for 17 tree species occurring in the study regions  
226 (Suppl. Mat. S1). A complete description of the model and how it was parameterized and  
227 validated can be found in Taylor et al. (2017). In order to determine the three dynamic  
228 input parameters for Biomass Succession extension, we simulated mono-specific 1-ha  
229 stands with PICUS for each of the 17 tree species. A factorial simulation design was used  
230 to simulate all mono-specific stands for tree species and landtype, under climate  
231 conditions for specific periods (2000-2010, 2011-2040, 2041-2070, 2071-2200) and  
232 forcing scenarios (baseline, RCP 4.5, RCP 8.5). Simulations were run for 300 years,  
233 starting from bare-ground and used the landtype-specific soil and the period- and climate  
234 scenario specific climate data. Values for *SEP*, *maxANPP* and *maxAGB* were then  
235 derived from these simulations (see Boulanger et al. 2016). Previous analyses (Boulanger  
236 et al. 2016, 2017, 2019) have shown good agreement between successional pathways  
237 predicted by LANDIS with those reported in the literature. Readers can refer to  
238 Supplementary Material S2 for *maxAGB* maps.

## 239 **2.5 Forest harvest**

240 The Biomass Harvest extension (v3.0; Gustafson et al. 2000) was used to simulate forest  
241 harvest. Relevant information regarding harvest parameters such as mean harvested patch  
242 size and total harvested area, was summarized by forest management units (FMU).  
243 Harvest was set to vary according to potential vegetation as defined by the Quebec's  
244 Hierarchical System for Territorial Ecological Classification (Bergeron et al. 1992). This  
245 system classifies forest stands according to their potential natural vegetation type, which  
246 is a function of climatological and geomorphological constraints on vegetation growth  
247 and succession. We simulated ecosystem-based forest management (EBFM), a harvest

248 scenario that should closely mimic the historical disturbance regimes (wildfires, spruce  
249 budworm outbreaks, single-tree mortality, small gap openings) occurring in the study  
250 area. Rotation length time and biomass removal levels were fixed according to current  
251 harvest regulations and expert advices as in Boulanger et al. (2019). Harvest rates were  
252 held constant throughout the simulations unless not enough stands qualified for harvest.  
253 In this latter case, harvest proceeded until there were no more stands available.

## 254 **2.6 Natural disturbances**

255 Fire, and spruce budworm (SBW, *Choristoneura fumiferana* [Clem.]) outbreaks, were  
256 considered as natural disturbances in the LANDIS-II simulations. Both disturbances  
257 historically had major impacts on Quebec' forest landscapes (e.g., Bouchard et al. 2006).  
258 SBW outbreaks are mostly prevalent within the mixedwood region whereas fires are  
259 more important within the boreal regions. The LANDIS-II Base Fire v3.0 extension was  
260 used to simulate stochastic fire events dependent upon fire ignition, initiation and spread.  
261 Fire regime data (annual area burned, fire occurrence, and mean fire size) were  
262 summarized into "fire regions" corresponding to the intersection of the study area and the  
263 Canadian Homogeneous Fire Regime zones of Boulanger et al. (2014). Baseline and  
264 future fire regime parameters within each fire region were calibrated according to models  
265 developed by Boulanger et al. (2014) and further updated for different RCP scenarios  
266 (Gauthier et al. 2015). Annual area burned (AAB) will remain minimal within northern  
267 hardwoods, regardless of climate scenarios whereas it will reach maximum values > 2%  
268 after 2080 in boreal west under RCP 8.5 (Supplementary Material S3).

269 The Biological Disturbance Agent (BDA) v3.0 extension (Sturtevant et al. 2004)  
270 modified to account for specific SBW parameters was used to simulate SBW outbreaks.

271 From the most to least vulnerable, host tree species for SBW included balsam fir (*Abies*  
272 *balsamea*), and white (*Picea glauca*), red (*P. rubens*) and black (*P. mariana*) spruces  
273 (Hennigar et al. 2008). Outbreaks are simulated as probabilistic events at the cell level  
274 with probabilities being a function of the site and neighborhood resource dominance  
275 (e.g., host species occurrence within a 1-km radius) as well as regional outbreak status.  
276 Outbreak-related tree mortality is contingent on these probabilities as well as on host  
277 species- and age-specific susceptibility. SBW outbreak parameters were calibrated and  
278 validated using various studies conducted within the boreal and mixedwood forests  
279 (Hennigar et al. 2008). Regional outbreaks were calibrated at the highest severity level  
280 possible were set to last one-time step (10 years) and to recur every 40 years in  
281 accordance with historical regional cycles (Boulanger et al. 2012).

## 282 **2.7 Simulation design**

283 As the study area is one of the largest ever simulated with LANDIS-II, we had to split it  
284 into five sub-areas that were simulated separately for computational reasons. In order to  
285 consider some potential edge effect related to these zones pertaining to e.g., seed  
286 dispersal or fire spread from nearby regions, we simulated each sub-area with an  
287 additional 50-km buffer overlapping the adjacent sub-areas. Simulations were run  
288 according to a factorial design, i.e., under the three climate projections, (corresponding to  
289 baseline, and the RCP 4.5 and RCP 8.5 radiative forcing scenarios) and two harvest  
290 scenarios. The two harvest scenarios were no harvest and a baseline, EBFM harvest  
291 where current parameters described above were applied. Five replicates were run for 130  
292 years for each harvest and climate change scenario combination, starting in the year  
293 2020, and using 10-year time steps. Except for scenarios involving the baseline climate,

294 we used the projected fire regime parameters projected for the 2011-2040 periods for the  
295 2020-2040 simulated years. Also, fire regime parameters were allowed to change in  
296 2041-2050 and 2071-2080 according to the average climate corresponding to each  
297 forcing scenario. Fire regime parameters for 2071-2080 were held constant up to 2150.  
298 Dynamic growth and establishment parameters (*SEP*, *maxANPP* and *maxAGB*), were  
299 allowed to change according to each climate scenario following the same schedule used  
300 for the fire regime parameters.

## 301 **2.8 Analyses**

302 We tested for the impacts of climate change and current harvest practices on forest  
303 landscape by calculating dissimilarities between projected forest landscapes and those  
304 under baseline climate. Analyses were performed by calculating Bray-Curtis dissimilarity  
305 ( $d_{BC}$ ) using species-specific AGB. First, species-specific AGB was averaged at the  
306 landtype-level at each timestep among replicates. Dissimilarities were then calculated  
307 relative to projections at time  $t$  as well as according to the harvest scenario under each  
308 climate forcing scenario separately. Landtype-level dissimilarities were then area-weight  
309 averaged at the forest region level.

310 Dissimilarities between projected and baseline forest landscapes can arise from changes  
311 in species-specific abundance (AGB), from changes in species composition *per se*, or  
312 from both (Basega 2013). Separating these components helps to identify the empirical  
313 patterns underlying changes in species composition (Basega 2013). We therefore  
314 decomposed all  $d_{BC}$  values into their two additive components i.e., the fraction linked to  
315 balanced variation in abundance ( $d_{BC-bal}$ ) and the one linked to abundance gradients ( $d_{BC-}$   
316  $gra$ ) (Basega 2013).  $d_{BC-bal}$  informs about change in species composition or species



317 turnover whereas  $d_{BC-gra}$  is related to change in species abundance. We then assessed  
318 trends in these two components according to climate and harvest scenarios in each of the  
319 four forest regions. All  $d_{BC}$  components were calculated using the *betapart* v1.5.2  
320 package (Basega et al. 2020) in R 3.6.2 (R Core Team 2019).

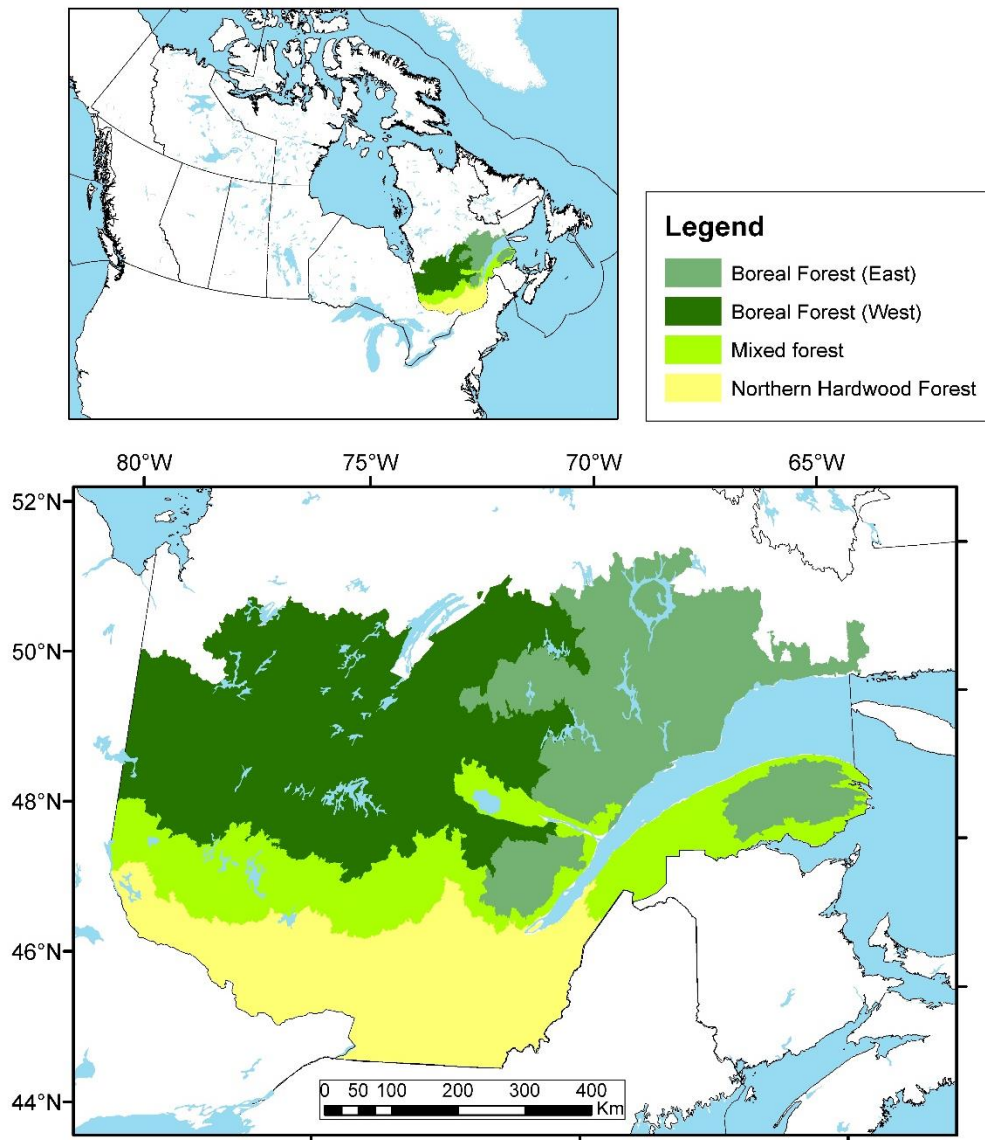

321

322 **Figure 1.** Location of the study area as well as the four forest regions considered for  
323 analyses.

324



## 325 **Results**

### 326 **Climate change impacts across forest regions**

327 Generally speaking, dissimilarities were highest for boreal west and appeared sooner in the  
328 simulations while being lowest for the northern hardwood throughout the simulated period,  
329 regardless of the climate scenarios (Fig. 2). That being said, dissimilarities increased over  
330 time and with increasing anthropogenic climate forcing in all regions (Fig. 2, see also  
331 Suppl. Mat S4). Dissimilarities under RCP 4.5 and RCP 8.5 strongly diverged in all regions  
332 in 2080-2100, showing a sharp increase under RCP 8.5 (Fig. 2).

333 With very few exceptions, dissimilarities with baseline climate forest landscapes were  
334 mostly linked to gradients in abundance ( $d_{BC-gra} > 50\%$ ) before 2100 rather than changes in  
335 species composition ( $d_{BC-bal}$ ) *per se*, regardless of forest regions and simulation scenarios  
336 (Figure 3). However, there were important differences in  $d_{BC-bal}$  trends between regions and  
337 scenarios.  $d_{BC-bal}$  tended to be higher in the mixedwood and northern hardwood forest  
338 regions, especially under RCP 4.5, while being lowest in the boreal west where it never  
339 exceeded 30% (Figure 3). In 2150 under RCP 4.5, more than 50% of the dissimilarities  
340 were related to  $d_{BC-bal}$  in the northern hardwood and mixedwood forest regions. Under RCP  
341 8.5,  $d_{BC-bal}$  never exceeded 50% in 2150 in any regions and was highest in the mixedwood  
342 and boreal east (Figure 3).  $d_{BC-bal}$  tended to increase with time in all scenarios except under  
343 RCP 8.5 in both mixedwood and northern hardwood regions. In these regions,  $d_{BC-bal}$  first  
344 increased up to 2080-2100. From this point,  $d_{BC-bal}$  sharply dropped under RCP 8.5 while  
345 it continued to increase under RCP 4.5 (Figure 3).

346 Dissimilarities linked to gradient in abundance can be associated with the strong climate-  
347 induced decline in total AGB throughout the study under RCP 8.5, most notably after 2100  
348 (Fig. 4). In boreal west, these declines would occur much sooner, i.e., as soon as 2050  
349 under milder (RCP 4.5) anthropogenic climate forcing. Under RCP 8.5, the total decrease  
350 in AGB relative to baseline climate was highest in this latter region (-54%) whereas AGB  
351 decline in other regions would reach between 35 and 40% by 2150 (Fig. 4). AGB decreases  
352 under RCP 4.5 would be much lower in any region. Under this scenario, total AGB in  
353 mixedwood and northern hardwood forest regions would decrease by 10 to 15% relative to  
354 baseline climate while differences in AGB between RCP 4.5 and the baseline climate  
355 would be virtually nil (Fig. 4).

356 In all forest regions, decrease in total AGB is mostly associated with important declines in  
357 boreal conifer AGB (Fig. 4, Suppl. Mat S5). These declines were more important with  
358 increasing anthropogenic climate forcing and with decreasing latitude. AGB declines were  
359 particularly important for white and black spruces regardless of the climate scenarios (Fig.  
360 4). More notably, declines in black spruce in boreal west, which is by far the most common  
361 species under current conditions in this region, would be dramatic as it would almost  
362 completely disappear by 2150 under RCP 8.5 (Suppl. Mat S5). Balsam fir and red spruce  
363 would also decline throughout the study area but mostly under RCP 8.5. Throughout the  
364 study area, climate-induced decreases in boreal conifer AGB would not be compensated  
365 by an increase in thermophilous species biomass which would rather maintain stable  
366 biomass relative to baseline climate (Fig. 4). Notable exception includes red maple AGB  
367 that would mostly increase under RCP 8.5 especially in the boreal east and mixedwood  
368 forest regions (Fig. 4).

369 As such, higher  $d_{BC-bal}$  in southernmost forest regions can be interpreted as gradual species  
370 turnovers from boreal to thermophilous species (Fig. 5). Increases in thermophilous  
371 proportions were highest in the mixedwood forest region (8 – 25% depending on scenarios  
372 with increased forcing) and were likely due to an increase in the proportions of red and  
373 sugar maples as well as American beech (Fig. 4). Overall increase in thermophilous  
374 proportions were relatively small (< 10%) in both boreal forest regions compared with  
375 baseline climate (Fig. 5). In these regions, changes in species composition were mostly  
376 related to transition from mid-/late successional species to higher proportions of pioneer  
377 species (Fig. 6). Pioneer species proportions strongly increased relative to baseline climate  
378 in boreal (+10-50%) but also in mixedwood (+10-25%) forest regions while this increase  
379 was much smaller in the northern hardwood region (Fig. 6). Increases were particularly  
380 important under RCP 8.5, notably after 2100 and in the boreal west region. Increases in  
381 pioneer proportions were mostly resulting from increased in trembling aspen (boreal  
382 regions) and red maple (mixedwood) AGB (Fig. 4).

### 383 **Harvest impacts in the climate change context**

384 Harvest was projected to generate more dissimilarities (higher  $d_{BC}$ ) between projected  
385 forest landscape and those under baseline climate than when it is not included in the  
386 simulations, for both the mixedwood and northern hardwood forest regions, regardless of  
387 the climate scenario (Figure 2, see also Suppl. Mat S2). Although overall  $d_{BC}$  were low,  
388 harvest had the most important impacts on dissimilarities in northern hardwoods when  
389 compared with scenarios without harvest (Figure 2). As opposed, in both boreal regions,  
390 virtually no difference in dissimilarities with baseline climate were projected between  
391 scenarios with or without harvest with the exception of boreal west under RCP 4.5.

392 Moreover, harvest had little impacts on how climate induced dissimilarities with baseline  
393 forest landscapes. Indeed, difference in  $d_{BC-bal}$  values were rather small (Figure 3) with  $d_{BC-}$   
394  $_{bal}$  tending to be slightly higher under harvest than under no harvest.

395 Harvest promoted and accelerated the proportion of thermophilous species AGB within the  
396 mixedwood forest region regardless of climate scenario, but most notably under RCP 8.5  
397 (Fig. 5). In this region, thermophilous species proportions were at least 5 points of  
398 percentage higher with harvest than no harvest under RCP 8.5. That being said,  
399 thermophilous species also expanded with harvest when compared to simulation without  
400 harvest, but at lower rates, under no or milder anthropogenic climate forcing in this forest  
401 region. Harvest impacts in this regard were relatively small in other forest regions (+1-2  
402 points of percentage). As expected, harvest also promoted pioneer species AGB virtually  
403 everywhere (Fig. 6). Impacts were slightly more important under RCP 8.5 than under RCP  
404 4.5 in the mixedwood and boreal west forest regions.

405

406

407

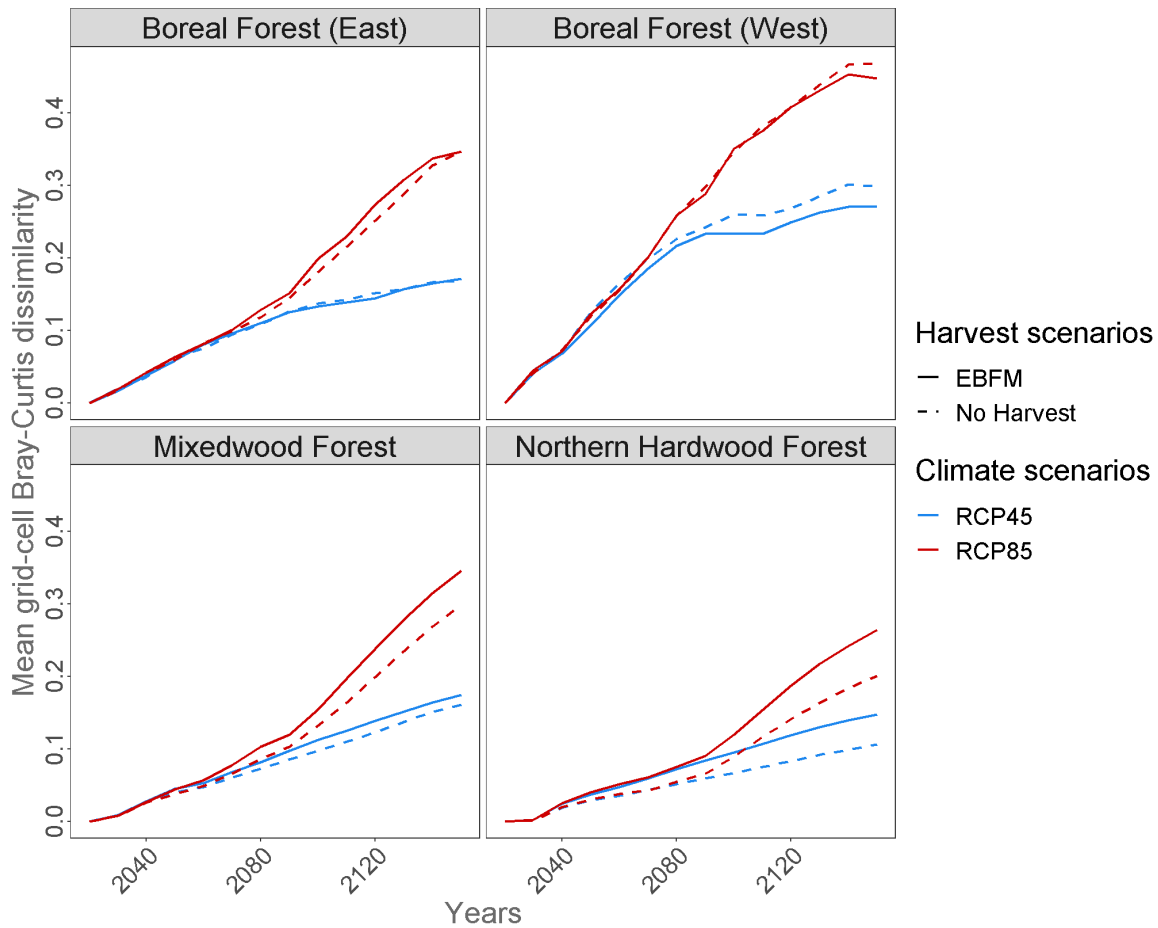

408

409 **Figure 2.** Temporal trends in Bray-Curtis dissimilarities ( $d_{BC}$ ) under RCP 4.5 and RCP 8.5

410 and the two harvest scenarios (EBFM = Ecosystem-based forest management; No harvest).

411 Dissimilarities were calculated against the respective harvest scenario under baseline

412 climate.

413

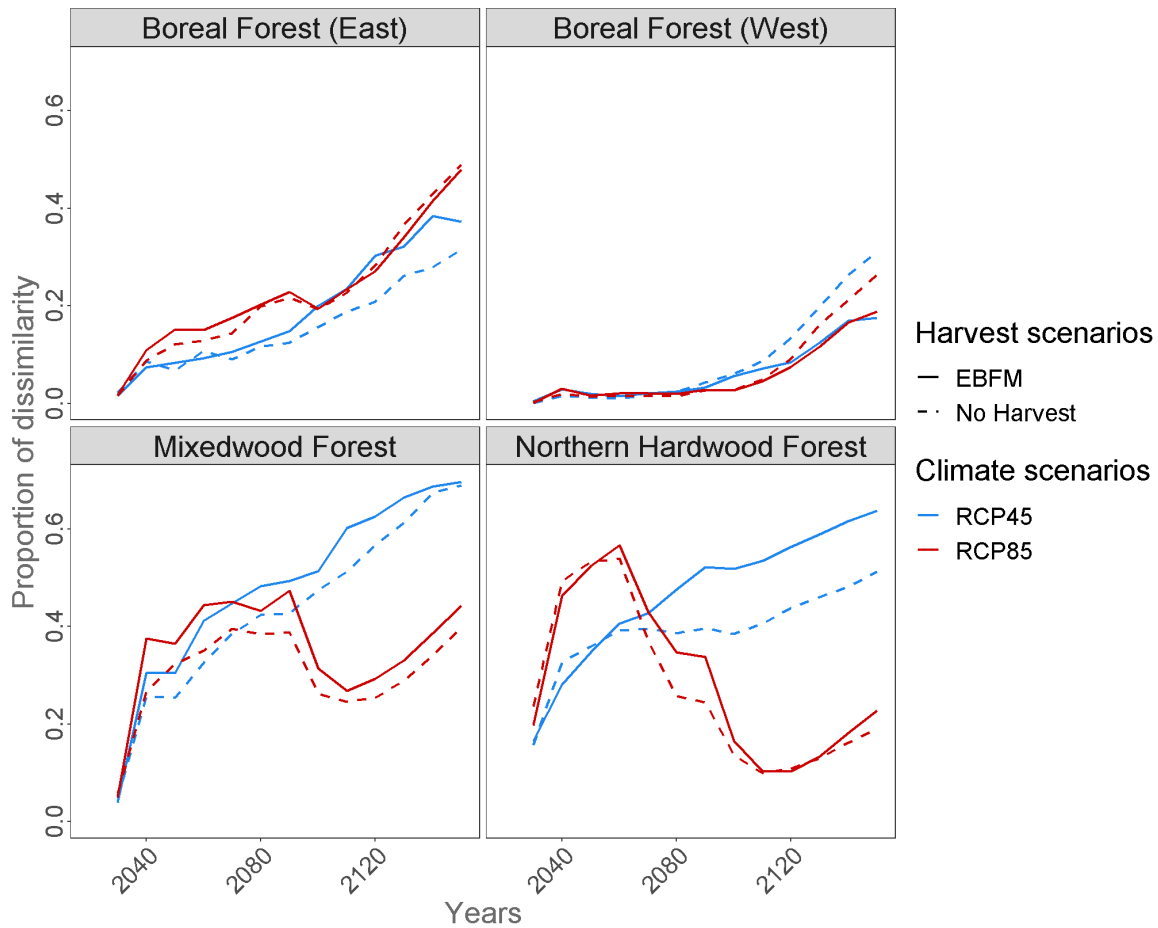

414

415 **Figure 3.** Temporal trends in the proportion of Bray-Curtis dissimilarities shown in figure  
416 2 linked to balanced variation in species abundance ( $d_{BC-bal}$ , Baselga 2013). Recall that  $d_{BC-}$   
417  $_{bal}$  is the inverse of the variation in Bray-Curtis dissimilarity linked to abundance gradient,  
418 i.e,  $d_{BC-gra} = 1 - d_{BC-bal}$  under RCP 4.5 and RCP 8.5 and the two harvest scenarios. Results  
419 are shown for the two climate and two harvest scenarios separately.

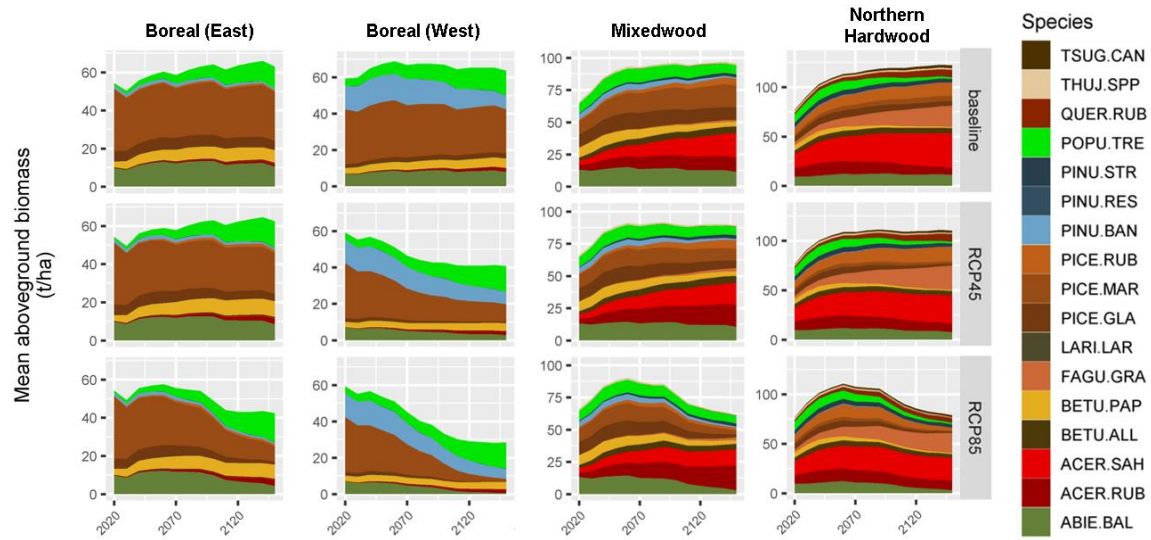

420

421 **Figure 4.** Stacked trends in species AGB for each of the four forest regions simulated under  
422 either baseline, RCP 4.5 or RCP 8.5 climate scenarios. See Suppl. Mat. S1 for species  
423 abbreviations. Only simulations considering baseline harvest are considered here.

424

425

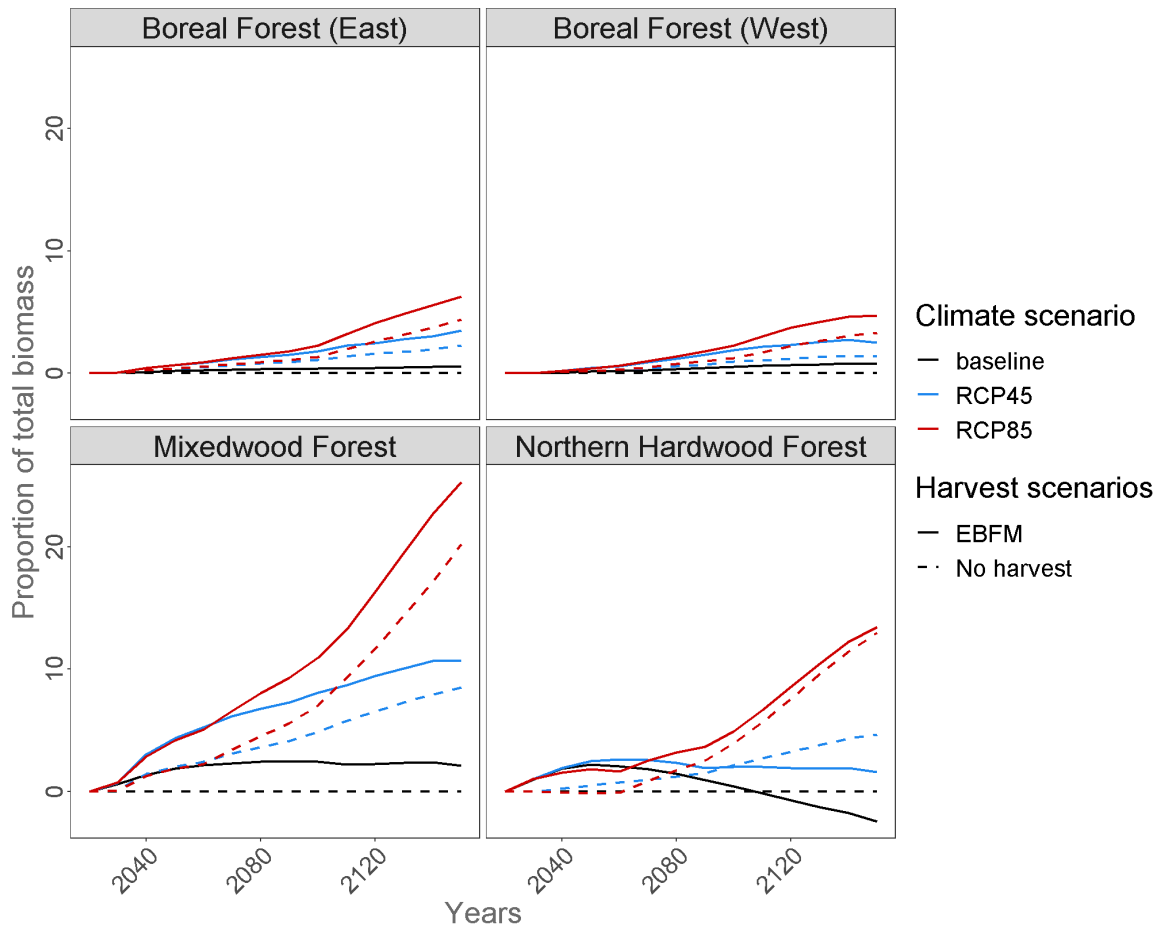

426

427 **Figure 5.** Temporal trends in proportions of thermophilous species (see table 1 for  
428 definition) under the three climate and two harvest scenarios. Results are expressed as  
429 differences with simulations conducted under baseline climate and no harvest at time  $t$ .

430



431

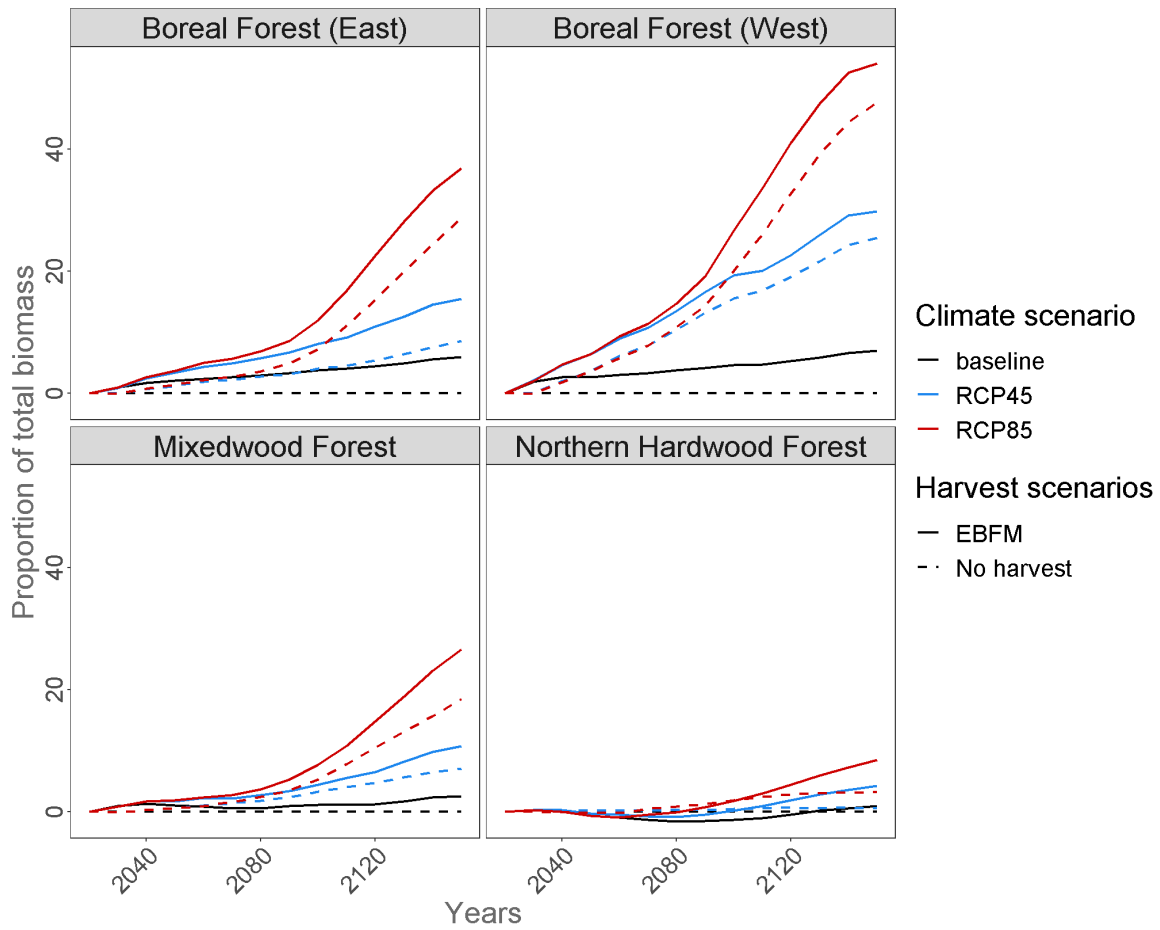

432

433 **Figure 6.** Same as figure 5 but for pioneer species proportions.

434

435 **Discussion**

436 Our results showed that climate change impacts will be striking in eastern Canada forest  
437 regions. Simulated changes were most important within the boreal forest regions, where  
438 they mainly translated into very sharp decreases in AGB. Important increase in wildfire  
439 activity which could reach >2 % of area burned per year by 2100 under RCP 8.5 (Suppl.  
440 Mat. S3) could explain these declines, most notably in boreal west. Increased annual area  
441 burned will result in extensive conversion of old-growth boreal-dominated stands into  
442 regenerating and young stands, which comprise much lower AGB (Boulanger et al.  
443 2016). Very short fire intervals (< 30 years) under RCP 8.5 in boreal west could also  
444 extensively preclude the regeneration of non-pyrophilous and late-successional species  
445 such as white spruce and balsam fir, further contributing to this decline. Most  
446 importantly, such an increase in wildfires could also impede black spruce regeneration by  
447 preventing individuals to reach sexual maturity. Overall, such declines might cause large  
448 areas in eastern Canada's boreal forests to experience "regeneration failures" which  
449 would further decrease the long-term ability of the boreal forest to accumulate AGB  
450 (Gauthier et al. 2015; Splawinski et al. 2019). This result is particularly dramatic as it  
451 could lead to the widespread extirpation (Suppl. Mat. S5) of black spruce, the Canada's  
452 boreal flagship species, in boreal west. As a corollary, increased disturbance rates under  
453 more important climate forcing will favour pioneer species, most notably trembling  
454 aspen, which were projected to mostly expand in boreal regions. Aspen was shown to  
455 increase with more frequent anthropogenic disturbances, including fires, within the last  
456 200 years in eastern Canada's boreal forest (Danneyrolles et al. 2016) and is also

457 projected to strongly increase with climate-induced changes throughout the boreal forest  
458 (Boulanger et al. 2016, 2017; Brecka et al. 2020).

459 Increased natural disturbance rates within the boreal forest regions likely cumulated with  
460 climate-induced growth constraints to most boreal species to further reduce total AGB.

461 Strong warming, especially under RCP 8.5, will gradually reduce the potential  
462 productivity of several boreal species throughout eastern Canada, except in the  
463 northernmost and most elevated lands (Suppl. Mat S2), as species will experience  
464 conditions further from their optimal climate tolerance. Similar declines in productivity  
465 have also been projected for boreal species within most of their range under aggressive  
466 climate forcing (Girardin et al. 2016; D'Orangeville et al. 2019), primarily as a result of  
467 increased metabolic respiration following more frequent and severe drought conditions  
468 (Girardin et al. 2016). Lack of propagules of warm-adapted species within most of the  
469 boreal range impeded potential AGB recovery from boreal conifer decline. In fact,  
470 thermophilous species migration towards more northern, suitable conditions will be  
471 strongly outpaced by the northward shift of the isotherms even under moderate forcing  
472 (Brice et al. 2019; Prasad et al. 2020). Considering their limited dispersal abilities, we  
473 projected that thermophilous species would colonize sites only few tens of km north of  
474 their actual northern range (Suppl. Mat S5), although suitable conditions would expand  
475 much further north under increased climate forcing (Suppl. Mat S2). Additionally, some  
476 thermophilous species (e.g., sugar maple) might face important growth constraints,  
477 presumably drought-induced (Taylor et al. 2017) even north of their current range under  
478 aggressive climate forcing (Suppl. Mat S2), compromising their potential expansion  
479 within the boreal forest. Notwithstanding the increased disturbance rates, thermophilous

480 species are therefore less likely to extensively compensate AGB losses by boreal species  
481 by introducing a significant “migration lag” within the boreal forest (Taylor et al. 2017;  
482 Prasad et al. 2020).

483 In the more southern mixedwood and northern hardwood regions, changes will be less  
484 important than within boreal regions and will further result from alteration in species  
485 composition. Thermophilous species proportions within those two forest regions will  
486 strongly increase at the expense boreal species. Climate-induced changes in growth  
487 directly altered the competitive abilities of boreal species, making these more likely to be  
488 outperformed by co-occurring thermophilous species (Fisichelli et al. 2014; Reich et al.  
489 2015; Boulanger et al. 2016). As opposed to boreal forest regions, this co-occurrence  
490 allows thermophilous species to partially compensate the decline in boreal species AGB  
491 in the mixedwood and northern hardwood. Notably, reduced climate-induced recruitment  
492 for balsam fir following SBW outbreaks could have allowed for co-occurring hardwood  
493 species turnover, leading to permanent thermophilization of the ecotone (Brice et al.  
494 2019, 2020). Combined with the boreal migration lag mentioned above, this suggests that  
495 the mixedwood forest region might strongly contract in the upcoming decades, making  
496 the ecotone between the northern hardwood and boreal forest much more abrupt.

497 Our results suggested that the boreal forest regions will be much less resilient than  
498 northern hardwoods to the projected changes in climate regimes. The boreal forest is  
499 known to have been particularly resilient to variations in climate and disturbance regimes  
500 during the last several millennia (Carcaillet et al. 2010). Indeed, stand-replacing  
501 disturbances (e.g., fires) that are mostly occurring within the boreal forests were  
502 hypothesized to promote resilience by favoring the recovery of resident species (Liang et

503 al. 2018). However, projected disturbance rates in the boreal forest will likely fall outside  
504 the range of natural variability, triggering potential important ecosystem shifts (Bergeron  
505 et al. 2006). Cumulative impacts of wildfires and productivity decline within boreal west  
506 could result in alternative stable states (Stralberg et al. 2018) toward landscapes more  
507 reminiscent of open parklands or taiga (Girard et al. 2007). Therefore, this extensive  
508 disturbance- and climate-induced biome shift projected for the next century would be  
509 unprecedented since the last glaciation in this area. Similar transitions from boreal forest  
510 to open parklands or prairie ecosystems is also projected for several regions in western  
511 Canada as a result of increase drought and wildfire activity (Stralberg et al. 2018).  
512 Diversified forests were shown to be more resilient under increased anthropogenic  
513 climate forcing (Duveneck et al. 2014; Mina et al. 2020). Higher species diversity along  
514 with diversified functional traits and low projected disturbance rates will help northern  
515 hardwood forest landscapes being more resilient to climate-induced changes although  
516 species turnover will likely occur.

517

518 Our analyses showed that current harvest strategies will strongly decrease forest inertia  
519 and will interact with anthropogenic climate forcing to further modify forest landscapes  
520 notably in the southernmost forest regions. In the mixedwood forest region for instance,  
521 harvest will accelerate climate-induced changes by hastening the increase in  
522 thermophilous species AGB, promoting a more rapid biome shift toward communities  
523 more typical of the northern hardwoods than under no harvest. Increased disturbance  
524 rates are known to catalyze changes toward more adapted species (Thom et al. 2017). We  
525 showed that harvest will favour opportunistic species such as red maple, a species known

526 as a “supergeneralist” for which historical harvest already contributed to its swift  
527 expansion throughout northeastern North America (Danneyrolles et al. 2016), notably by  
528 interacting with climate change (Brice et al. 2020). Harvest strategies likely played a role  
529 to affect forest inertia differently between forest regions. Frequent and widespread partial  
530 cutting (typically removing ~25-40% of total biomass over > 3% of the territory per year)  
531 in the mixedwood and northern hardwood, as oppose to relatively infrequent but severe  
532 clearcuts (removing 90-100% of the biomass over < 1% of the territory per year) in the  
533 boreal forests, potentially affected forest inertia more severely over a large portion of the  
534 territory, hence accelerating species turnover in these southern regions. Moderate  
535 disturbances as these harvest strategies were shown to strongly decrease forest inertia and  
536 favor species turnover by promoting hardwood species recruitment and growth at the  
537 temperate-boreal ecotone (Brice et al. 2019, 2020). As after natural disturbances that  
538 these harvest management strategies are emulating, climate-induced growth constraints  
539 on boreal species make them less likely to recolonize small gaps in areas where they co-  
540 occur with thermophilous species (Leithead et al. 2010). Furthermore, natural  
541 disturbances are projected to remain stable and/or infrequent (wildfires, windthrow) or  
542 even to decrease (SBW outbreaks) in the mixedwood and northern hardwood (Boulangier  
543 et al. 2014, 2016). This makes harvest more likely to alter forest inertia in these regions  
544 than within the two boreal forest regions, especially boreal west, where climate impacts  
545 on disturbance rates will overwhelm those generated by harvest even in the short term.

546 The forest sector is currently one of the most important industry in eastern Canada,  
547 representing \$11.5 MM, i.e., 4.4% of Quebec’s GDP in 2006 (MFFP 2016). Alterations  
548 in biomass, age structure and species composition resulting from changes in natural

549 disturbances and climate-induced growth constraints would likely reduce timber supply  
550 (Gauthier et al. 2015; Daniel et al. 2017; Boucher et al. 2019; Brecka et al. 2020) which  
551 would greatly affect supply value chains (Yemshanov et al. 2018). A posteriori analyses  
552 showed that strong anthropogenic climate forcing will reduce harvested biomass by as  
553 much as 40% by 2150 (Suppl. Mat. S6). Furthermore, concurrent with the overall decline  
554 in harvested biomass, strong compositional shifts towards deciduous species in the  
555 mixedwood could have serious economic implications as conifers are generally preferred  
556 by the industry. The type and quality of wood products that companies can manufacture  
557 (Brecka et al. 2020) could thus be seriously affected. In this context, increased costs,  
558 timber supply shortages and important impacts on the supply value chains are to be  
559 expected throughout the study area, with a potential collapse of timber harvest in some  
560 regions (McKenney et al. 2016, Brecka et al. 2020). Major changes to harvest practices  
561 that consider projected wildfire activities and changes in productivity (Irulappa Pillai  
562 Vijayakumar et al. 2016; Boulanger et al. 2017) are thus strongly needed to preserve the  
563 long-term sustainability of wood supply in eastern Canada. Adaptation strategies should  
564 be region-specific as we showed that climate change will affect forest landscapes  
565 differently throughout the study area. Reducing long-term harvest targets by lengthening  
566 rotation periods could ensure steady, sustainable timber supplies by maintaining a stock  
567 of timber that could buffer the effects of wildfire activity (Raulier et al. 2014; Brecka et  
568 al. 2020). Furthermore, harvest strategies fostering natural transition to thermophilous  
569 species in the mixedwood forest region could be favored (Pedlar et al. 2012;). In  
570 combination with e.g., assisted migration, these strategies would help compensate  
571 biomass loss in regions where boreal species growth will be strongly constrained.

572 Eastern Canada forest ecosystems might cross important tipping points leading to  
573 significant changes under strong anthropogenic climate forcing. We showed that climate-  
574 induced impacts were much more important and swifter under RCP 8.5, with great  
575 divergence with baseline-climate forest landscapes occurring after 2080 throughout the  
576 study area. We showed that significant forest landscape alterations, notably total AGB  
577 declines, might be prevented under RCP 4.5 for most of eastern Canada (except boreal  
578 west), presumably causing minimal impacts on ecosystem services. This should call for  
579 strong mitigation measures in order to maintain anthropogenic climate forcing to lower  
580 values than those expected by the end of the century under business-as-usual global  
581 strategies (Hausfather and Peter 2020).

## 582 **Acknowledgements**

583 We want to acknowledge Jean-Daniel Sylvain who provided the soil data. We also want  
584 to thank Anthony Taylor and David Price who provided PICUS parameters and climate  
585 data respectively. Dominic Cyr helped parameterize LANDIS-II. This research was  
586 funded by Natural Resources Canada.

587



588

589 **References**

- 590 Basega A (2013) Separating the two components of abundance-based dissimilarity:  
591 balanced changes in abundance vs. abundance gradients. *Methods Ecol Evol* 4:552-  
592 557.
- 593 Basega A, Orme D, Villeger S, de Bortoli J, Leprieur, F, Logez M (2020) betapart :  
594 Partitioning beta diversity into turnover and nestedness components. R package  
595 version 1.5.2. <https://CRAN.R-project.org/package=betapart>
- 596 Bergeron, JF, Saucier JP, Robert D, Robitaille A (1992) Québec forest ecological  
597 classification program. *For Chron* 68:53-63.
- 598 Bergeron Y, Cyr D, Drever CR, Flannigan M, Gauthier S, Kneeshaw D, Lauzon E, Leduc  
599 A, Le Goff H, Lesieur D, Logan K (2006) Past, current, and future fire frequencies  
600 in Quebec's commercial forests : implications for the cumulative effects of harvest  
601 and fire on age-class structure and natural disturbance-based management. *Can J*  
602 *For Res* 36:2737-2744.
- 603 Bouchard M, Kneeshaw D, Bergeron Y (2006) Forest dynamics after successive spruce  
604 budworm outbreaks in mixedwood forests. *Ecology* 87:2319-2329.
- 605 Boucher D, Boulanger Y, Aubin I, Bernier PY, Beaudoin A, Guindon L, Gauthier S  
606 (2019) Current and projected cumulative impacts of fire, drought, and insects on  
607 timber volumes across Canada. *Ecol Appl* 28:1245-1259.
- 608 Boulanger Y, Arseneault D, Morin H, Jardon Y, Bertrand P, Dagneau C (2012)  
609 Dendrochronological reconstruction of spruce budworm (*Choristoneura fumiferana*

610 Clem.) outbreaks in southern Québec for the last 400 years. *Can J For Res* 42:1264-  
611 1276.

612 Boulanger Y, Gauthier S, Burton PJ (2014). A refinement of models projecting future  
613 Canadian fire regimes using homogeneous fire regime zones. *Can J For Res* 44:365-  
614 376.

615 Boulanger Y, Taylor A, Price DT, Cyr D, McGarrigle E, Rammer W, Sainte-Marie G,  
616 Beaudoin A, Guindon L, Mansuy N (2016) Climate change impacts on forest  
617 landscapes along the Canadian southern boreal forest transition zone. *Landsc Ecol*  
618 32:1415-1431.

619 Boulanger Y, Taylor A, Price DT, Cyr D, Sainte-Marie G (2017) Stand-level drivers  
620 most important in determining boreal forest response to climate change. *J Ecol*  
621 106:977-990.

622 Boulanger Y, Arseneault D, Boucher Y, Gauthier S, Cr D, Taylor AR, Price DT, Dupuis  
623 S (2019) Climate change will affect the ability of forest management to reduce gaps  
624 between current and presettlement forest composition in southeastern Canada.  
625 *Landsc Ecol* 34:159-174.

626 Brecka AF, Boulanger Y, Searle EB, Taylor AR, Price DT, Zhu Y, Shahi , Chen HY  
627 (2020) Sustainability of Canada’s forestry sector may be compromised by  
628 impending climate change. *Forest Ecology and Management* (in press)

629 Brice MH, Cazelles K, Legendre P, Fortin M (2019). Disturbances amplify tree  
630 community responses to climate change in the temperate– boreal ecotone. *Glob*  
631 *Ecol Biogeogr* 28:1668–1681. <https://doi.org/10.1111/geb.12971>

- 632 Brice MH, Vissault S, Vieira W, Gravel D, Legendre P, Fortin MJ (2020) Moderate  
633 disturbances accelerate forest transition dynamics under climate change in the  
634 temperate-boreal ecotone of eastern North America. *Glob Change Biol* 26:4418-  
635 4435.
- 636 Brown CD, Vellend M (2014). Non-climatic constraints on upper elevational plant range  
637 expansion under climate change. *Proc Royal Soc B Biol Sci*, 281: 20141779.  
638 <https://doi.org/10.1098/rspb.2014.1779>
- 639 Cadieux P, Boulanger Y, Cyr D, Taylor AR, Price DT, Tremblay JA (2019). Spatially  
640 explicit climate change projections for the recovery planning of threatened species:  
641 The Bicknell's Thrush (*Catharus Bicknelli*) as a case study. *Glob Ecol Conserv*,  
642 e00530.
- 643 Cadieux P, Boulanger Y, Cyr D, Taylor AR, Price DT, Solymos P, Stralberg D, Chen  
644 HYH, Brecka A, Tremblay J (2020) Projected effects of climate change on boreal  
645 bird community accentuated by anthropogenic disturbances in western boreal  
646 forest, Canada. *Div Distrib* (in press)
- 647 Carcaillet C, Richard PJH, Bergeron Y, Fréchette B, Ali AA (2010) Resilience of the  
648 boreal forest in response to Holocene fire-frequency changes assessed by pollen  
649 diversity and population dynamics. *Int J Wildl Fire* 19:1026-1039.
- 650 Cyr D, Gauthier S, Bergeron Y, Carcaillet C (2009) Forest management is driving the  
651 eastern North American boreal forest outside its natural range of variability. *Front*  
652 *Ecol Environ* 7:519-524.

- 653 D'Orangeville L, Houle D, Duchesne L, Phillips RP, Bergeron Y, Kneeshaw D (2018)  
654 Beneficial effects of climate warming on boreal tree growth may be transitory.  
655 Nature Comm 9:3213.
- 656 Daniel CJ, Ter-Mikaelian MT, Wotton BM, Rayfield B, Fortin MJ (2017) Incorporating  
657 uncertainty into forest management planning: Timber harvest, wildfire and climate  
658 change in the boreal forest. For Ecol Manag 400:542-554.
- 659 Danneyrolles V, Arseneault D, and Bergeron Y (2016) Long-term compositional changes  
660 following partial disturbance revealed by the resurvey of logging concession limits  
661 in the northern temperate forest of eastern Canada. Can J For Res 46:943-949.
- 662 Duveneck MJ, Scheller RM, White MA, Handler SD, Ravenscroft C (2014) Climate  
663 change effects on northern Great Lake (USA) forests: A case for preserving  
664 diversity. Ecosphere 5, 23.
- 665 Duveneck MJ, Scheller RM (2015a) Measuring and managing resistance and resilience  
666 under climate change in northern Great Lake forests (USA). Landsc Ecol 31:669-  
667 686 doi: 10.1007/s10980-015-0273-6.
- 668 Duveneck MJ, Scheller RM (2015b) Climate-suitable planting as a strategy for  
669 maintaining forest productivity and functional diversity. Ecol Appl 25:1653-1668.
- 670 Fisichelli NA, Frelich LE, Reich PB (2014) Temperate tree expansion into adjacent  
671 boreal forest patches facilitated by warmer temperatures. Ecography 37:152-161.
- 672 Gauthier S, Bernier PY, Boulanger Y, Guo J, Guindon L, Beaudoin A, Boucher D (2015)  
673 Vulnerability of timber supply to projected changes in fire regime in Canada's  
674 managed forests. Can J For Res 45:1439-1447.

- 675 Girard F, Payette S, Gagnon R (2007) Rapid expansion of lichen woodlands within the  
676 closed-crown boreal forest zone over the last 50 years caused by stand disturbances  
677 in eastern Canada. *J Biogeogr* 35:529-537.
- 678 Girardin MP, Bouriaud O, Hogg EH, Kurz W, Zimmermann NE, Metsaranta JM, de Jong  
679 R, Frank DC, Esper J, Büntgen U, Guo XJ, Bhatti J (2016) No growth stimulation  
680 of Canada's boreal forest under half-century of combined warming and CO<sub>2</sub>  
681 fertilization. *Proc Natl Acad Sci USA*. 113: E8406-E8414.
- 682 Gustafson EJ, Shifley SR, Mladenoff DJ, Nimerfro KK, He HS (2000) Spatial simulation  
683 of forest succession and timber harvest using LANDIS. *Can J For Res* 30:32-43.
- 684 Hausfather Z, Peter GA (2020). Emissions – the ‘business as usual’ story is misleading.  
685 *Nature*. 577, 618-620.
- 686 Heyder U, Schaphoff S, Gerten D, Lucht W (2011) Risk of severe climate change impact  
687 on the terrestrial biosphere. *Environ Res Lett* 6:034036.
- 688 Hanes CC, Wang X, Jain P, Parisien MA, Little JM, Flannigan MD (2019) Fire-regime  
689 changes in Canada over the last half century. *Can J For Res* 49:256-269.
- 690 Hennigar CR, MacLean DA, Quiring DT, Kershaw Jr JA (2008) Differences in spruce  
691 budworm defoliation among balsam fir and white, red, and black spruce. *For Sci*  
692 54:158-166.
- 693 Irulappa Pillai Vijayakumar DB, Raulier F, Bernier P, Paré D, Gauthier S, Bergeron Y,  
694 Pothier D (2016) Cover density recovery after fire disturbance controls landscape  
695 aboveground biomass carbon in the boreal forest of eastern Canada. *For Ecol Manag*  
696 360:170-180.

- 697 Johnstone JF, Allen CD, Franklin JF, Frelich LE, Harvey BJ, Higuera PE, Mack MC,  
698 Meentemeyer RK, Metz MR, Perry GLW, Schoennagel T, Turner MG (2016)  
699 Changing disturbance regimes, ecological memory, and forest resilience. *Front Ecol*  
700 *Environ* 14:369-378. <https://doi.org/10.1002/fee.1311>
- 701 Kurz WA, Stinson G, Rampley GC, Dymond CC, Neilson ET (2008) Risk of natural  
702 disturbances makes future contribution of Canada's forests to the global carbon cycle  
703 highly uncertain. *Proc Natl Acad Sci* 105:1551-1555.
- 704 Leithead MD, Anand M, Silva LCR (2010) Northward migrating trees establish in  
705 treefall gaps at the northern limit of the temperate-boreal ecotone, Ontario, Canada.  
706 *Oecologia* 164:1095-1106. <https://doi.org/10.1007/s00442-010-1769-z>
- 707 Lexer MJ, Honninger K (2001) A modified 3D-patch model for spatially explicit  
708 simulation of vegetation composition in heterogeneous landscapes. *For Ecol*  
709 *Manag* 144:43-65.
- 710 Liang Y, Duveneck MJ, Gustafson EJ, Serra-Diaz JM, Thompson JR (2018) How  
711 disturbance, competition, and dispersal interact to prevent tree range boundaries  
712 from keeping pace with climate change. *Glob Change Biol*, 24:e335-e351.  
713 <https://doi.org/10.1111/gcb.13847>
- 714 McKenney D, Pedlar J, Hutchinson M, Papadopol P, Lawrence K, Campbell K,  
715 Milewska E, Hopkinson RF, Price D (2013) Spatial climate models for Canada's  
716 forestry community. *For Chron* 89:659-663.
- 717 Mckenney DW, Yemshanov D, Pedlar JH, Allen D, Lawrence K, Hope E, Lu B, Eddy B  
718 (2016) Canada's Timber Supply: Current Status and Future Prospects under a  
719 Changing Climate. Natural Resources Canada, Canadian Forest Service. Great

- 720 Lakes Forestry Centre, Sault Ste. Marie, Ontario. 75p. Information Report GLC-X-  
721 15.
- 722 Messier C, Bauhus J, Doyon F, Maure F, Sousa-Silva R, Nolet P, Mina M, Aquilué N,  
723 Fortin MJ, Puettmann K (2019) The functional complex network approach to foster  
724 forest resilience to global changes. *Forest Ecosyst* 6:21.
- 725 MFFP (2016) Critères et indicateurs d'aménagement durable des forêts. [online]  
726 <https://mffp.gouv.qc.ca/publications/enligne/forets/criteres-indicateurs/accueil.asp>
- 727 Mina M, Messier C, Duveneck M, Fortin MJ, Aquilué N (2020) Network analysis can  
728 guide resilience-based management in forest landscapes under global change. *Ecol*  
729 *Appl* e02221. in press
- 730 Payette S, Delwaide A (2003) Shift of conifer boreal forest to lichen– heath parkland  
731 caused by successive stand disturbances. *Ecosystems*, 6:540–550.  
732 <https://doi.org/10.1007/PL00021507>
- 733 Pedlar JH, McKenney DW, Aubin I, Beardmore T, Beaulieu J, Iverson L, O'Neill GA,  
734 Winder RS, Ste-Marie C (2012) Placing forestry in the assisted migration debate.  
735 *BioScience* 62:835-842.
- 736 Prasad A, Pedlar J, Peters M, McKenney D, Iverson L, Matthews S, Adams B (2020)  
737 Combining US and Canadian forest inventories to assess habitat suitability and  
738 migration potential of 25 tree species under climate change. *Div Distrib* 26:1142-  
739 1159.
- 740 Price DT, Alfaro RI, Brown KJ, Flannigan MD, Fleming RA, Hogg EH, Girardin MP,  
741 Lakusta T, Johnston M, McKenney DW, Pedlar JH, Stratton T, Sturrock RN,

- 742 Thomson ID, Trofymow JA, Venier LA (2013). Anticipating the consequences of  
743 climate change for Canada's boreal forest ecosystems. *Environ Rev* 21:322-365.  
744 doi:10.1139/er-2013-0042
- 745 Pureswaran DS, De Grandpré L, Paré D, Taylor A, Barrette M, Morin H, Régnière J,  
746 Kneeshaw DD (2015) Climate-induced changes in host tree–insect phenology may  
747 drive ecological state-shift in boreal forests. *Ecology* 96:1480–1491.
- 748 R Core Team (2019). R: A language and environment for statistical computing. R  
749 Foundation for Statistical Computing, Vienna, Austria. URL [https://www.R-](https://www.R-project.org/)  
750 [project.org/](https://www.R-project.org/).
- 751 Raulier F, Dhital N, Racine P, Tittler R, Fall A (2014) Increasing resilience of timber  
752 supply: How a variable buffer stock of timber can efficiently reduce exposure to  
753 shortfalls caused by wildfires. *For. Pol. Econom.* 46, 47-55.
- 754 Reich PB, Sendall KM, Rice K, Rich RL, Stefanski A, Hobbie SE, Montgomery RA  
755 (2015) Geographic range predicts photosynthetic and growth response to warming  
756 in co-occurring tree species. *Nature Clim Change* 5:148-152.
- 757 Robitaille A, Saucier JP (1998) *Paysages régionaux du Québec méridional*, Publications  
758 du Québec, Sainte-Foy, Quebec, Canada.
- 759 Scheller RM, Mladenoff DJ (2004) A forest growth and biomass module for a landscape  
760 simulation model, LANDIS: design, validation, and application. *Ecol Model*  
761 180:211-229.



- 762 Scheller RM, Mladenoff DJ (2008) Simulated effects of climate change, fragmentation,  
763 and inter-specific competition on tree species migration in northern Wisconsin,  
764 USA. *Clim Res* 36:191-202.
- 765 Scheller RM, Domingo JB, Sturtevant BR, Williams JS, Rudy A, Gustafson EJ,  
766 Mladenoff DJ (2007) Design, development, and application of LANDIS-II, a spatial  
767 landscape simulation model with flexible spatial and temporal resolution. *Ecol*  
768 *Model* 201:409-419.
- 769 Sittaro F, Paquette A, Messier C, Nock CA (2017). Tree range expansion in eastern North  
770 America fails to keep pace with climate warming at northern range limits. *Glob*  
771 *Change Biol* 23:3292-3301. <https://doi.org/10.1111/gcb.13622>
- 772 Splawinski TB, Gauthier S, Jetté JP, Bergeron Y (2019) Analyzing risk of regeneration  
773 failure in the managed boreal forest of northwestern Quebec. *Can J For Res* 49:680-  
774 691.
- 775 Steenberg JWN, Duinker PN, Bush PG (2013) Modelling the effects of climate change  
776 and timber harvest on the forests of central Nova Scotia, Canada. *Ann For Sci*  
777 70:61-73.
- 778 Stralberg D, Wang X, Parisien MA, Robinne FN, Sólymos P, Mahon CL, Nielsen SE,  
779 Bayne EM (2018) Wildfire-mediated vegetation change in boreal forests of Alberta,  
780 Canada. *Ecosphere* 9:e02156.
- 781 Sturtevant BR, Gustafson EJ, Li W, He HS (2004) Modeling biological disturbances in  
782 LANDIS: a module description and demonstration using spruce budworm. *Ecol*  
783 *Model* 180:153-174. Taylor AR, Boulanger Y, Price DT, Cyr D, McGarrigle E,

784 Rammer W, Kershaw JA (2017) Rapid 21<sup>st</sup> century climate change projected to  
785 shift composition and growth of Canada's Acadian Forest Region. *For Ecol*  
786 *Manage.* 405:284-294.

787 Tremblay JA, Boulanger Y, Cyr D, Taylor AR, Price DT, St-Laurent MH (2018) Harvest  
788 interacts with climate change to affect future habitat quality of a focal species in  
789 eastern Canada's boreal forest. *PLoS ONE* 13, e0191645.  
790 doi:10.1371/journal.pone.0191645.

791 van Vuuren DP, Edmonds J, Kainuma M, Riahi K, Thomson A, Hibbard K, Hurtt GC,  
792 Kram T, Krey V, Lamarque JF, Masui T, Meinhausen M, Nakicenovic N, Smith SJ,  
793 Rose SK (2011) The representative concentration pathways: An overview. *Clim*  
794 *Change* 109:5-31.

795 Wang WJ, He HS, Fraser JS, Thompson FR, Shifley SR, Spetich MA (2014) LANDIS  
796 PRO: a landscape model that predicts forest composition and structure changes at  
797 regional scales. *Ecography* 37:1-5.

798 Yemshanov DW, Mckenney D, Hope ES (2018) Comparing alternative biomass supply  
799 options for Canada: What story do cost curves tell? *BioResources* 12:3157-3164.

800

## Supplementary Material S1 – LANDIS-II and PICUS parameters

**Table S1.** LANDIS-II input data for tree species simulated within the study area.

| Species                      | Species code | Longevity | Age at maturity | Shade tolerance† | Effective seed dispersal (m)‡ | Maximum seed dispersal (m) | Vegetative regeneration | Post-fire regeneration | Growth curve shape parameter | Mortality curve shape parameter | Thermal preference* | Successional stage** |
|------------------------------|--------------|-----------|-----------------|------------------|-------------------------------|----------------------------|-------------------------|------------------------|------------------------------|---------------------------------|---------------------|----------------------|
| <i>Abies balsamea</i>        | ABIE.BAL     | 150       | 30              | 5                | 25                            | 160                        | No                      | Seeding                | 0                            | 25                              | boreal              | M/L- succ.           |
| <i>Acer rubrum</i>           | ACER.RUB     | 150       | 10              | 3                | 100                           | 200                        | Yes                     | Resprout               | 0                            | 25                              | Therm.              | Pioneer              |
| <i>Acer saccharum</i>        | ACER.SAH     | 300       | 40              | 5                | 100                           | 200                        | Yes                     | Resprout               | 1                            | 15                              | Therm.              | M/L- succ.           |
| <i>Betula alleghaniensis</i> | BETU.ALL     | 300       | 40              | 3                | 100                           | 400                        | Yes                     | Resprout               | 1                            | 15                              | Therm.              | M/L- succ.           |
| <i>Betula papyrifera</i>     | BETU.PAP     | 150       | 20              | 2                | 200                           | 5000                       | Yes                     | Resprout               | 0                            | 25                              | boreal              | Pioneer              |
| <i>Fagus grandifolia</i>     | FAGU.GRA     | 250       | 40              | 5                | 30                            | 3000                       | Yes                     | Seeding                | 1                            | 15                              | Therm.              | M/L- succ.           |
| <i>Larix laricina</i>        | LARILAR      | 150       | 40              | 1                | 50                            | 200                        | No                      | Seeding                | 0                            | 25                              | boreal              | Pioneer              |
| <i>Picea glauca</i>          | PICE.GLA     | 200       | 30              | 3                | 100                           | 303                        | No                      | Seeding                | 1                            | 15                              | boreal              | M/L- succ.           |
| <i>Picea mariana</i>         | PICE.MAR     | 200       | 30              | 4                | 80                            | 200                        | No                      | Serotiny               | 1                            | 15                              | boreal              | M/L- succ.           |
| <i>Picea rubens</i>          | PICE.RUB     | 300       | 30              | 4                | 100                           | 303                        | No                      | Seeding                | 1                            | 15                              | boreal              | M/L- succ.           |
| <i>Pinus banksiana</i>       | PINU.BAN     | 150       | 20              | 1                | 30                            | 100                        | No                      | Serotiny               | 0                            | 25                              | boreal              | Pioneer              |
| <i>Pinus resinosa</i>        | PINU.RES     | 200       | 40              | 2                | 12                            | 275                        | No                      | Seeding                | 1                            | 15                              | boreal              | Pioneer              |
| <i>Pinus strobus</i>         | PINU.STR     | 300       | 20              | 3                | 100                           | 250                        | No                      | Seeding                | 1                            | 15                              | Therm.              | M/L- succ.           |
| <i>Populus tremuloides</i>   | POPU.TRE     | 150       | 20              | 1                | 1000                          | 5000                       | Yes                     | Resprout               | 0                            | 25                              | boreal              | Pioneer              |

|                           |          |     |    |   |    |      |     |          |   |    |        |            |
|---------------------------|----------|-----|----|---|----|------|-----|----------|---|----|--------|------------|
| <i>Quercus rubra</i>      | QUER.RUB | 250 | 30 | 3 | 30 | 3000 | Yes | Resprout | 1 | 15 | Therm. | M/L- succ. |
| <i>Thuja occidentalis</i> | THUJ.OCC | 300 | 30 | 5 | 45 | 60   | No  | Seeding  | 1 | 15 | boreal | M/L- succ. |
| <i>Tsuga canadensis</i>   | TSUG.CAN | 300 | 60 | 5 | 30 | 100  | No  | Seeding  | 1 | 15 | Therm. | M/L- succ. |

\* Thermophilous (Therm.):  $\text{minGDD} \geq 500$  AND  $\text{maxGDD} \geq 4000$  (see table S2). All other species were considered boreal

\*\* Pioneer:  $\text{Shade tolerance} \leq 2$  and  $\text{Longevity} \leq 200$  years. All other species were considered mid- to late-successional (M/L – succ.)

† Index of the ability of species to establish under varying light levels where 1 is the least shade tolerant and 5 is the most shade tolerant.

‡ Distance within which 95 % of seeds disperse.

**Table S2. Select input parameters specific to PICUS for species simulated within the study area.**

| <b>Species</b> | <b>Soil nitrogen*</b> | <b>Minimum soil pH<sup>†</sup></b> | <b>Maximum soil pH<sup>†</sup></b> | <b>Minimum GDD (Base temp 5°C)<sup>‡‡</sup></b> | <b>Maximum GDD (Base temp 5°C)<sup>‡‡</sup></b> | <b>Maximum SMI§</b> | <b>Optimum SMI§</b> |
|----------------|-----------------------|------------------------------------|------------------------------------|-------------------------------------------------|-------------------------------------------------|---------------------|---------------------|
| ABIE.BAL       | 2                     | 2                                  | 9                                  | 150                                             | 2723                                            | 0.3                 | 0                   |
| ACER.RUB       | 2                     | 2                                  | 9.5                                | 500                                             | 6608                                            | 0.5                 | 0.05                |
| ACER.SAH       | 2                     | 1.7                                | 9.9                                | 450                                             | 5093                                            | 0.3                 | 0                   |
| BETU.ALL       | 2                     | 2                                  | 10                                 | 500                                             | 4517                                            | 0.5                 | 0.05                |
| BETU.PAP       | 2                     | 2.2                                | 9.4                                | 150                                             | 3081                                            | 0.5                 | 0.05                |
| FAGU.GRA       | 2                     | 2.1                                | 9                                  | 500                                             | 5602                                            | 0.7                 | 0.1                 |
| LARI.LAR       | 1                     | 3                                  | 9.6                                | 150                                             | 2548                                            | 0.3                 | 0                   |
| PICE.GLA       | 3                     | 2                                  | 10.2                               | 150                                             | 2495                                            | 0.5                 | 0.05                |
| PICE.MAR       | 2                     | 2                                  | 8.5                                | 150                                             | 2495                                            | 0.3                 | 0                   |
| PICE.RUB       | 2                     | 2                                  | 7.8                                | 450                                             | 3239                                            | 0.3                 | 0                   |
| PINU.BAN       | 1                     | 2.5                                | 10.2                               | 300                                             | 3188                                            | 0.7                 | 0.1                 |
| PINU.RES       | 1                     | 2.5                                | 8                                  | 500                                             | 3300                                            | 0.7                 | 0.1                 |
| PINU.STR       | 2                     | 2                                  | 9.3                                | 500                                             | 4261                                            | 0.7                 | 0.1                 |

|          |   |     |    |     |      |     |      |
|----------|---|-----|----|-----|------|-----|------|
| QUER.RUB | 2 | 2.3 | 11 | 150 | 3024 | 0.5 | 0.05 |
| POPU.TRE | 2 | 2.3 | 11 | 150 | 3024 | 0.5 | 0.05 |
| THUJ.OCC | 2 | 3   | 10 | 500 | 3383 | 0.7 | 0.1  |
| TSUG.CAN | 2 | 2.2 | 9  | 500 | 4660 | 0.5 | 0.05 |

---

\* Nitrogen response curves: Three classes (1-3) with 1 being very tolerant

† USDA plant fact sheets (USDA, 2016) and the Ontario Silvics Manual (OMNR, 2000) were used to derive the widest optimum pH range possible.

‡ Growing Degree Days (GDD). We used McKenney et al. (2011) growing season model, specifically the minimum GDD for the 0°C and growing season window with degree days over 5°C. For the maximum GDD, we used GDD Maximum from McKenney's previous growing season model (McKenney et al. 2007).

§ Soil Moisture Index (SMI). Determines each species tolerance to drought (see Lexer and Honninger pg. 52). HighTolerance (0.1 to 0.7), MedTolerance (0.05 to 0.5 ), LowTolerance (0 to 0.3).

## References

- Lexer MJ, Honninger K (2001) A modified 3D-patch model for spatially explicit simulation of vegetation composition in heterogeneous landscapes. *For Ecol Manag* 144:43-65.
- McKenney DW, Pedlar JH, Lawrence K, Campbell K, Hutchinson MF (2007) Potential impacts of climate change on the distribution of North American trees. *BioScience* 57:939-948.
- McKenney DW, Pedlar JH, Rood RB, Price DT (2011) Revisiting projected shifts in the climate envelopes of North American trees using updated general circulation models. *Glob Change Biol* 17:2720-2730.
- OMNR (2000) A silvicultural guide to managing southern Ontario forests, Version 1.1. Ont. Min. Nat. Resour. Queen's Printer for Ontario. Toronto. 648 p.
- USDA, NRCS (2016) The PLANTS Database (<http://plants.usda.gov>, 22 June 2016). National Plant Data Team, Greensboro, NC 27401-4901 USA.

**Supplementary Material S2.** Maps showing for each tree species the difference in landtype-level *maxAGB* (tons per ha) as assessed from PICUS under A) RCP 4.5 or B) RCP 8.5 for the 2071-2100 period with the one simulated under historical climate. Forest regions are outlined in black. *maxAGB* was one of the dynamic inputs used in the Biomass Succession extension in LANDIS-II. We only show *maxAGB* since other dynamic inputs (*SEP* and *maxANPP*) were highly correlated to *maxAGB* (data not shown). See the Material and Methods section for details regarding the calculation of *maxAGB*.

A) RCP 4.5

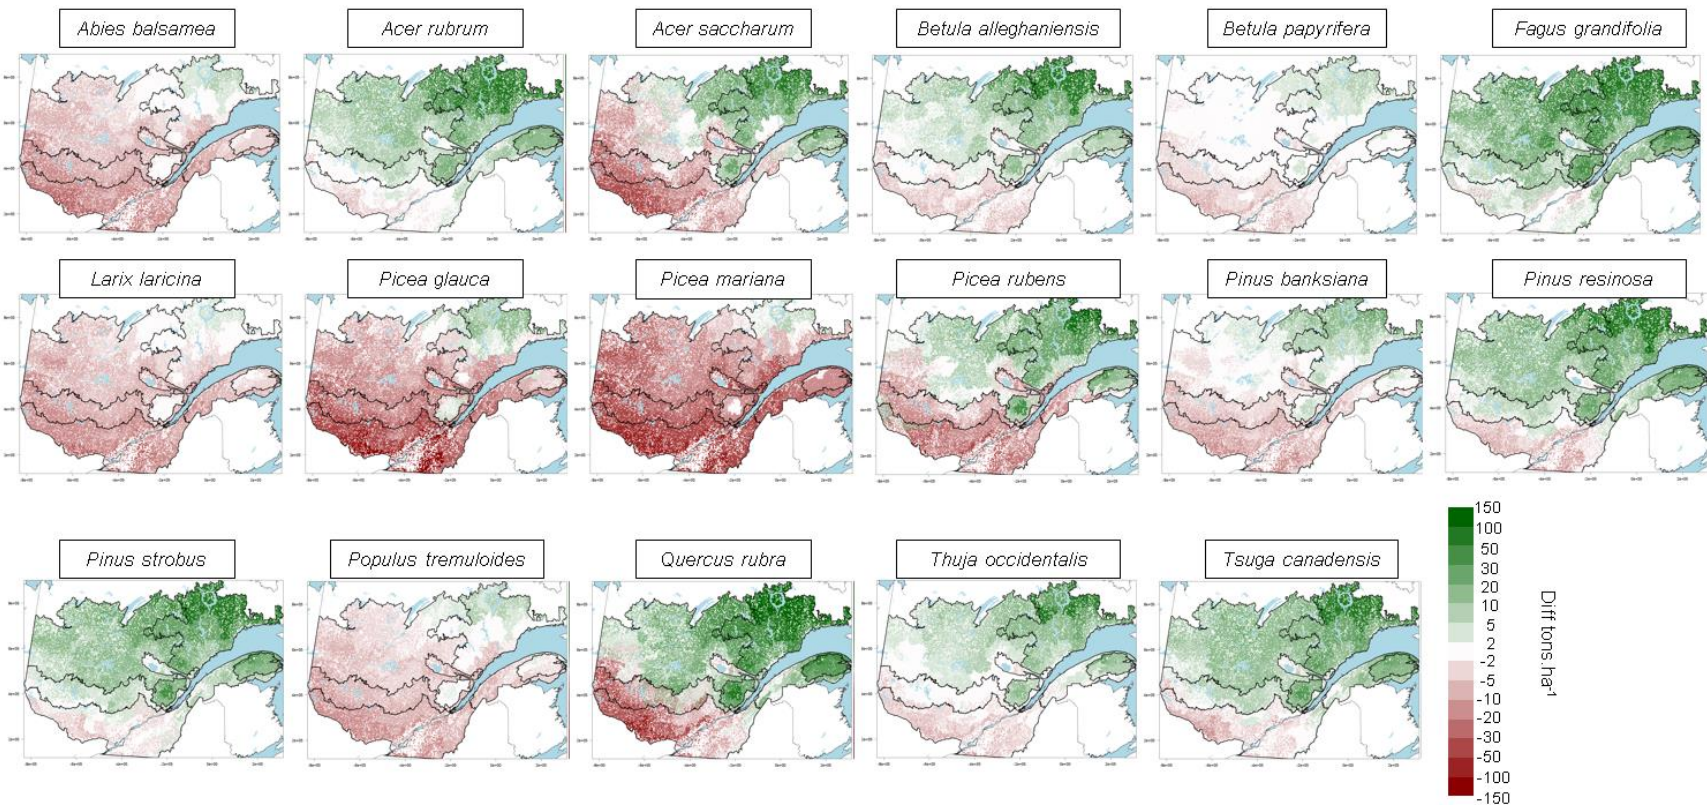



B) RCP 8.5

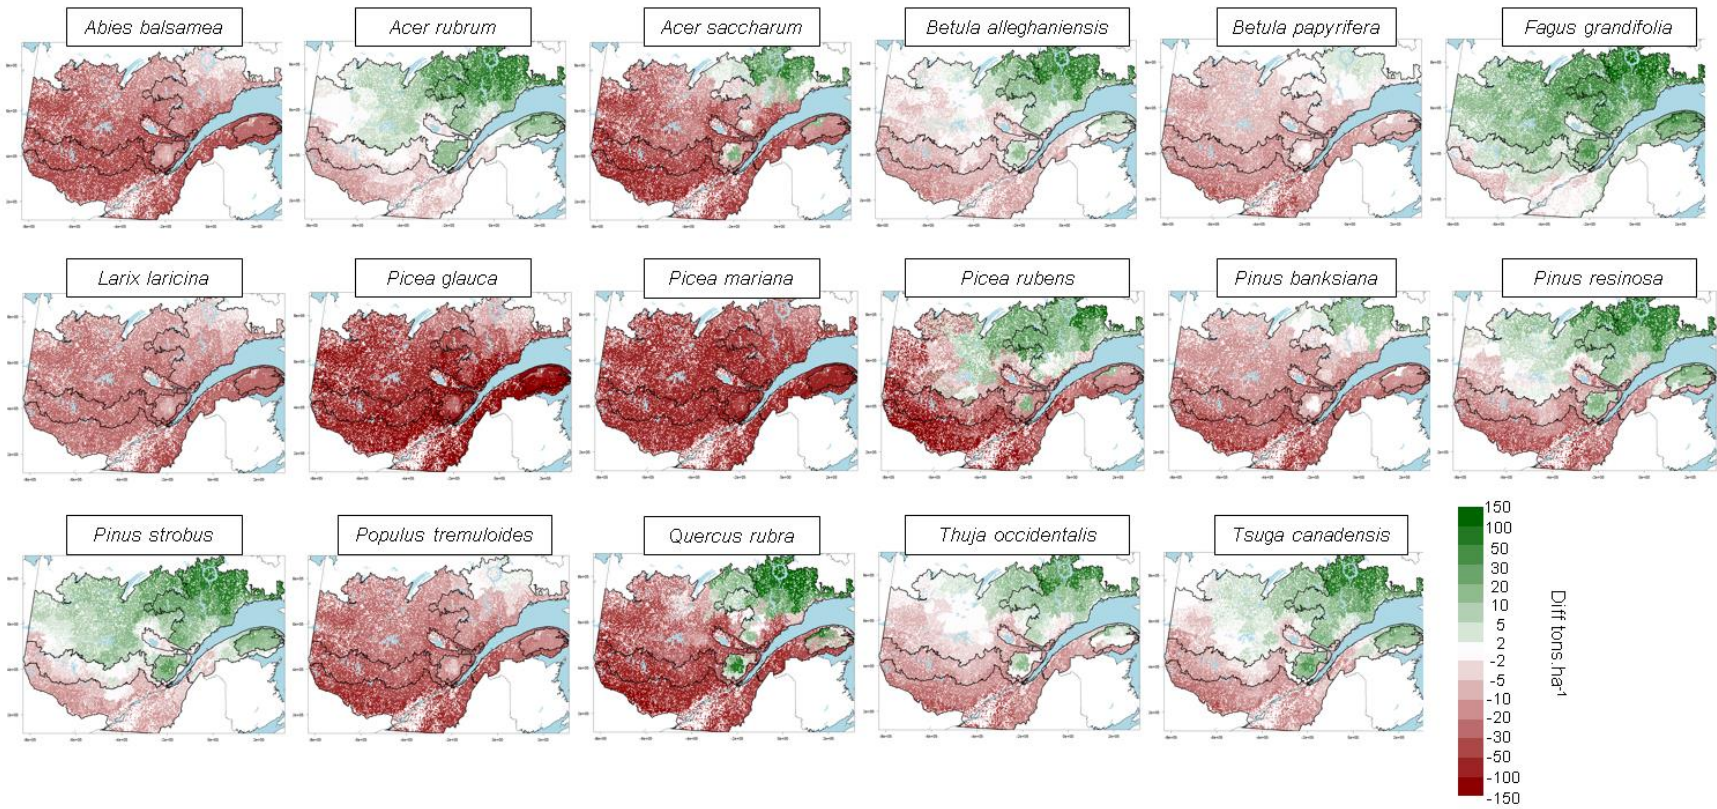

**Supplementary Material S3.** Annual area burned (%) simulated within each of the four forest regions under baseline, RCP 4.5 and RCP 8.5 climate respectively. Values are only showed for simulations including EBFM harvest and are averaged across the five replicates

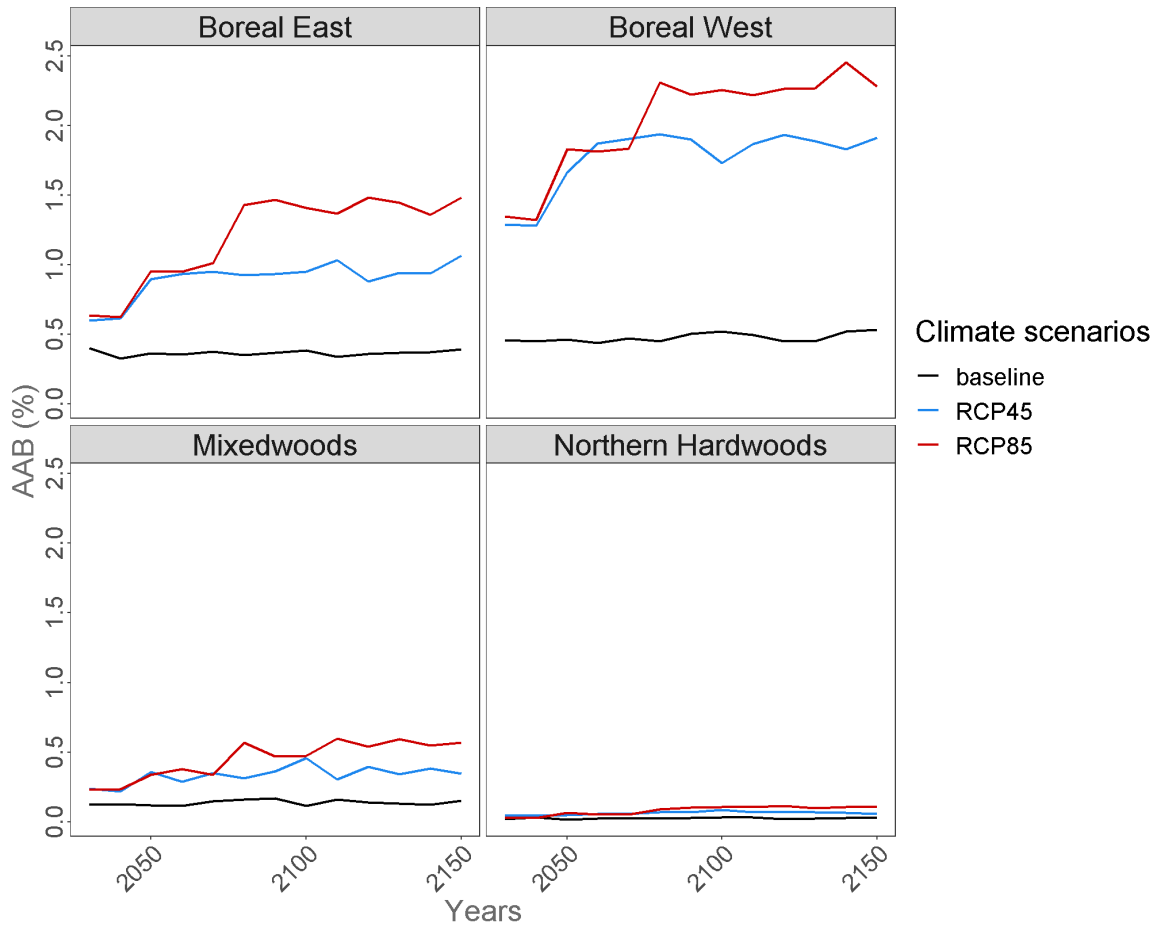

**Supplementary Material S4.** Maps showing Bray-Curtis dissimilarity at the landtype scale. Results are shown at years 2100 and 2150 for simulations run under the RCP 4.5 and RCP 8.5 climate forcing separately. Forest regions are outlines in black.

A) Simulations without harvest

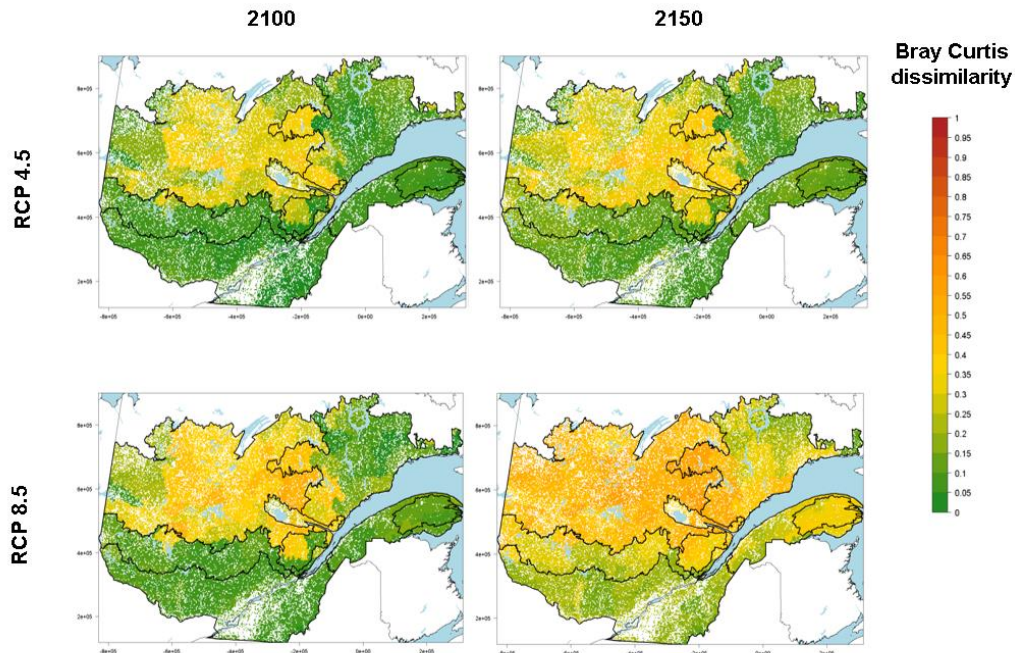

B) Simulations with harvest

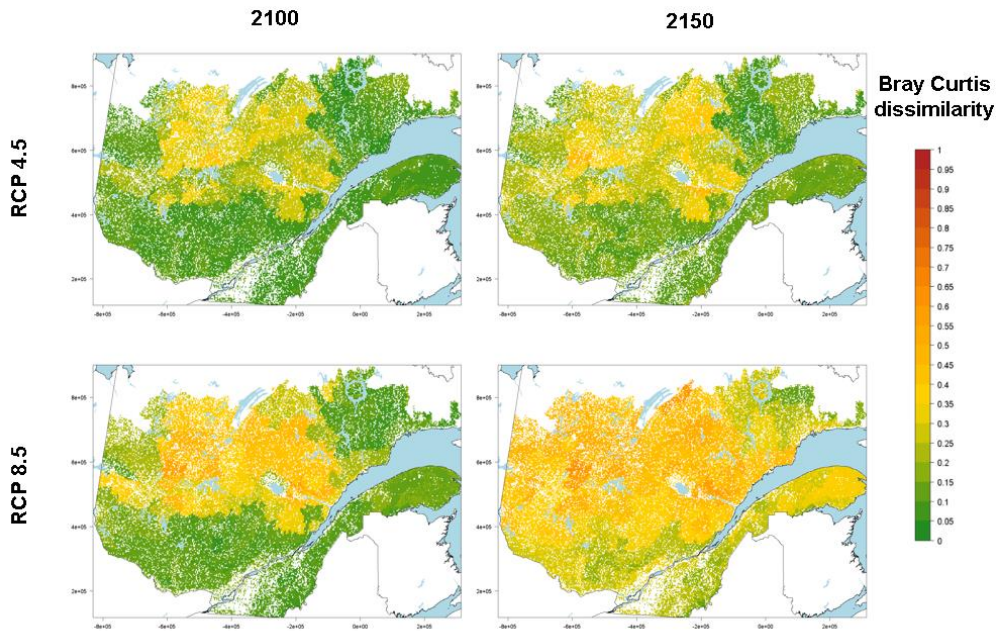



**Supplementary Material S5.** Maps showing for each tree species the difference in AGB (tons per ha) under A) RCP 4.5 or B) RCP 8.5 in 2150 with the one simulated under historical climate in 2150. We also show pixels where species either colonized (blue) or were extirpated (pink). To be extirpated, a species AGB in 2020 must be higher than its 1<sup>st</sup> percentile (as calculated from the 2020 maps) and drop to nil in 2150. For a pixel to be colonized, the species must be absent (AGB = 0) in 2020 and must be higher than its 1<sup>st</sup> percentile (as calculated from the 2020 maps) in 2150. We are only showing results where EBFM harvest was included. Forest regions are outlined in black.

A) RCP 4.5

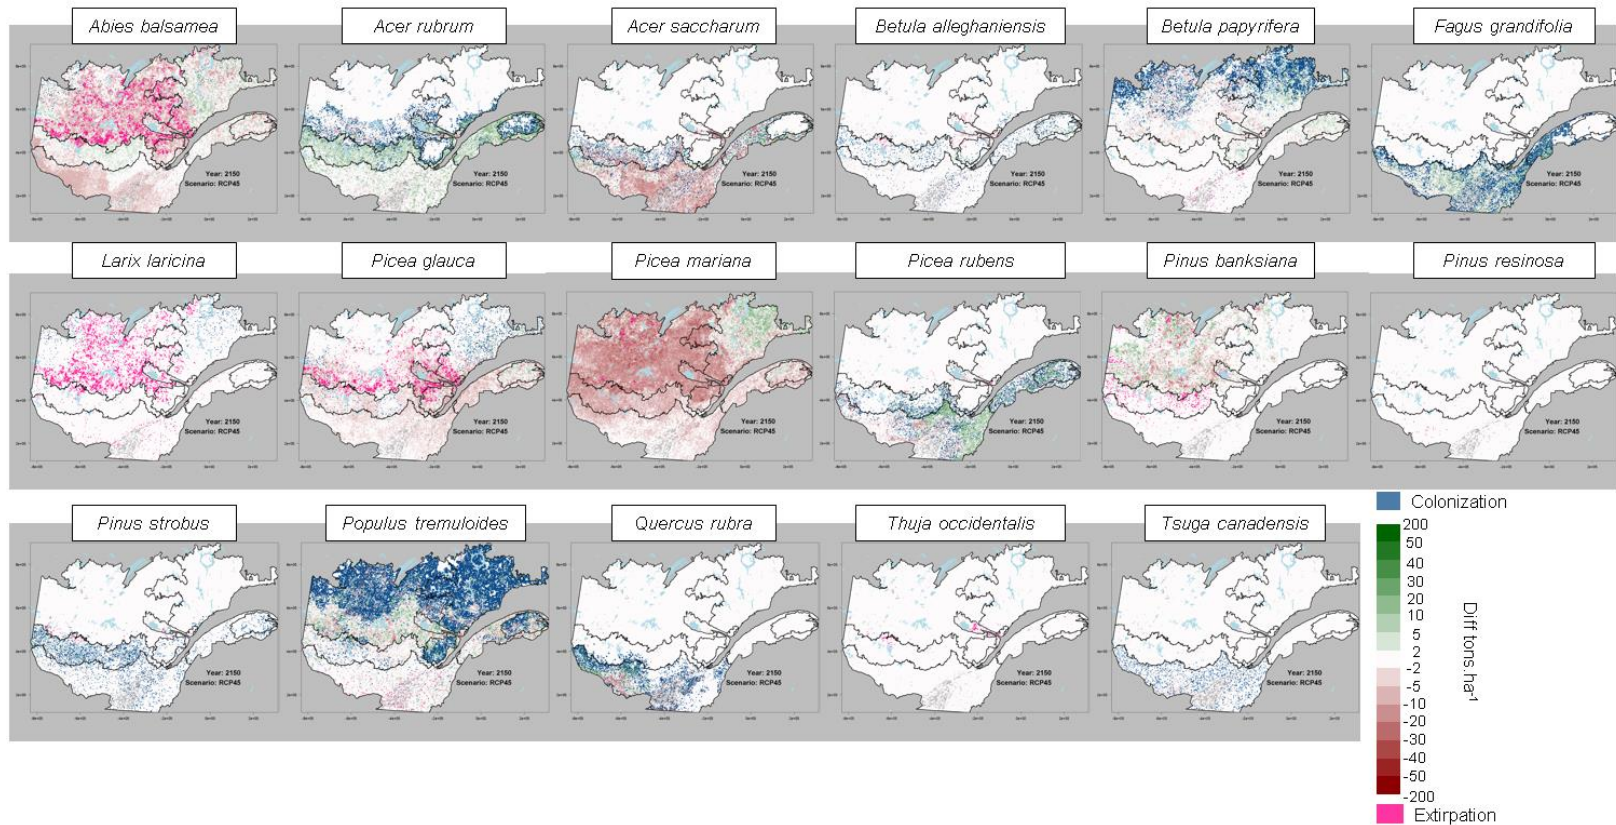

B) RCP 8.5

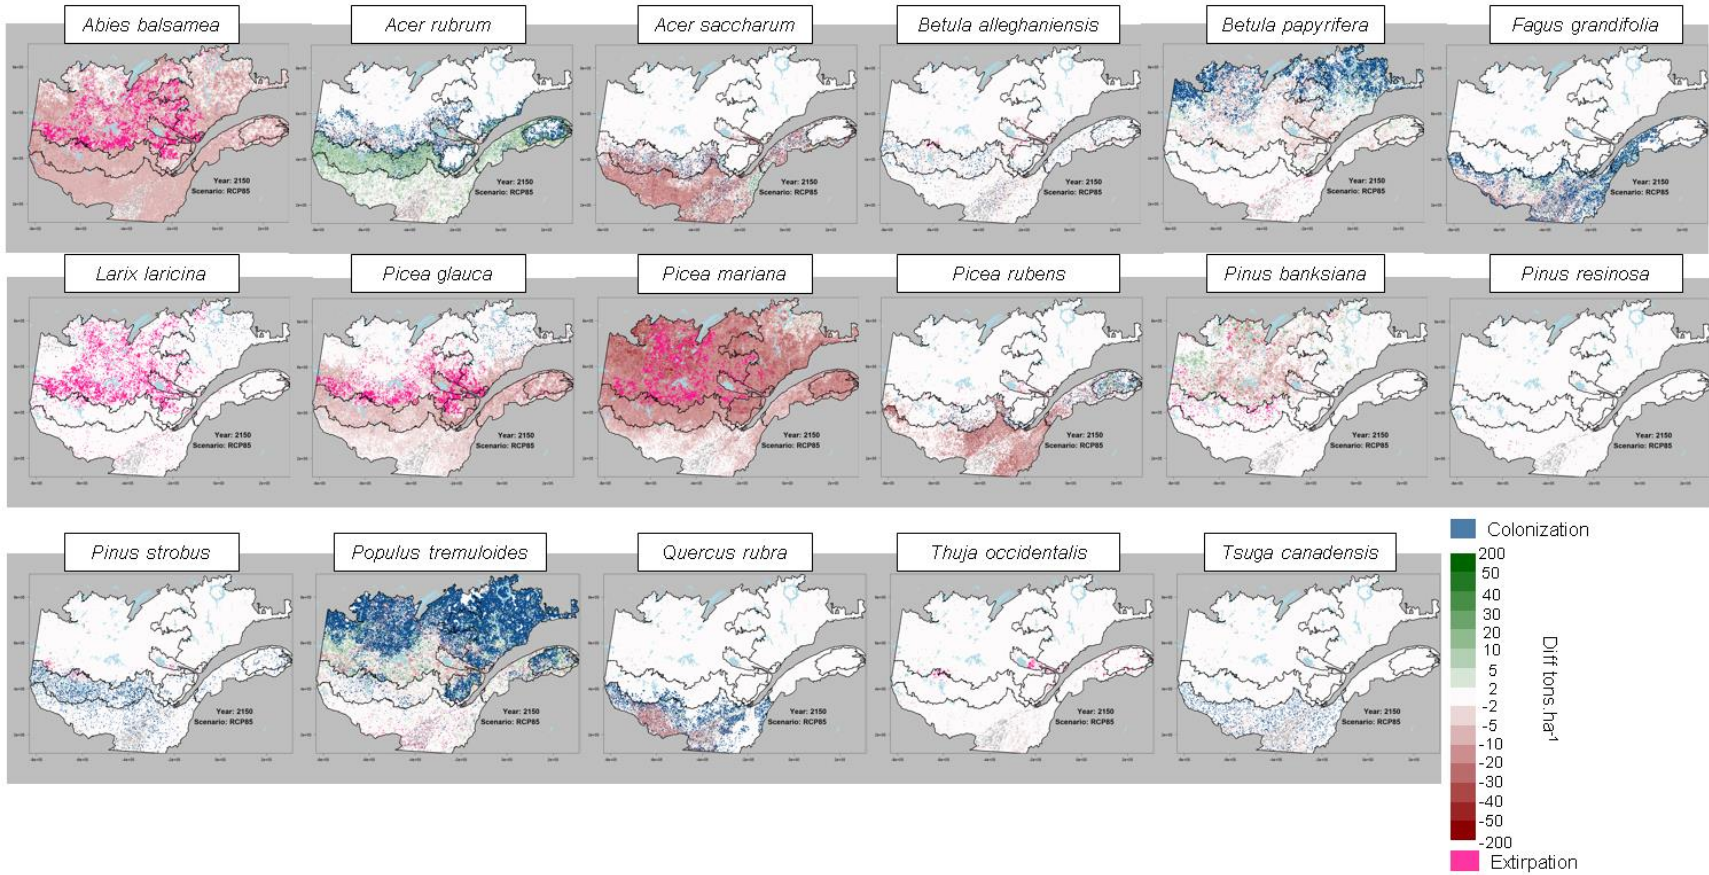

**Supplementary Material S6.** Temporal trends in AGB harvested under the three climate and two harvest scenarios. Results are expressed as differences (%) with AGB harvested at time  $t$  under baseline climate.

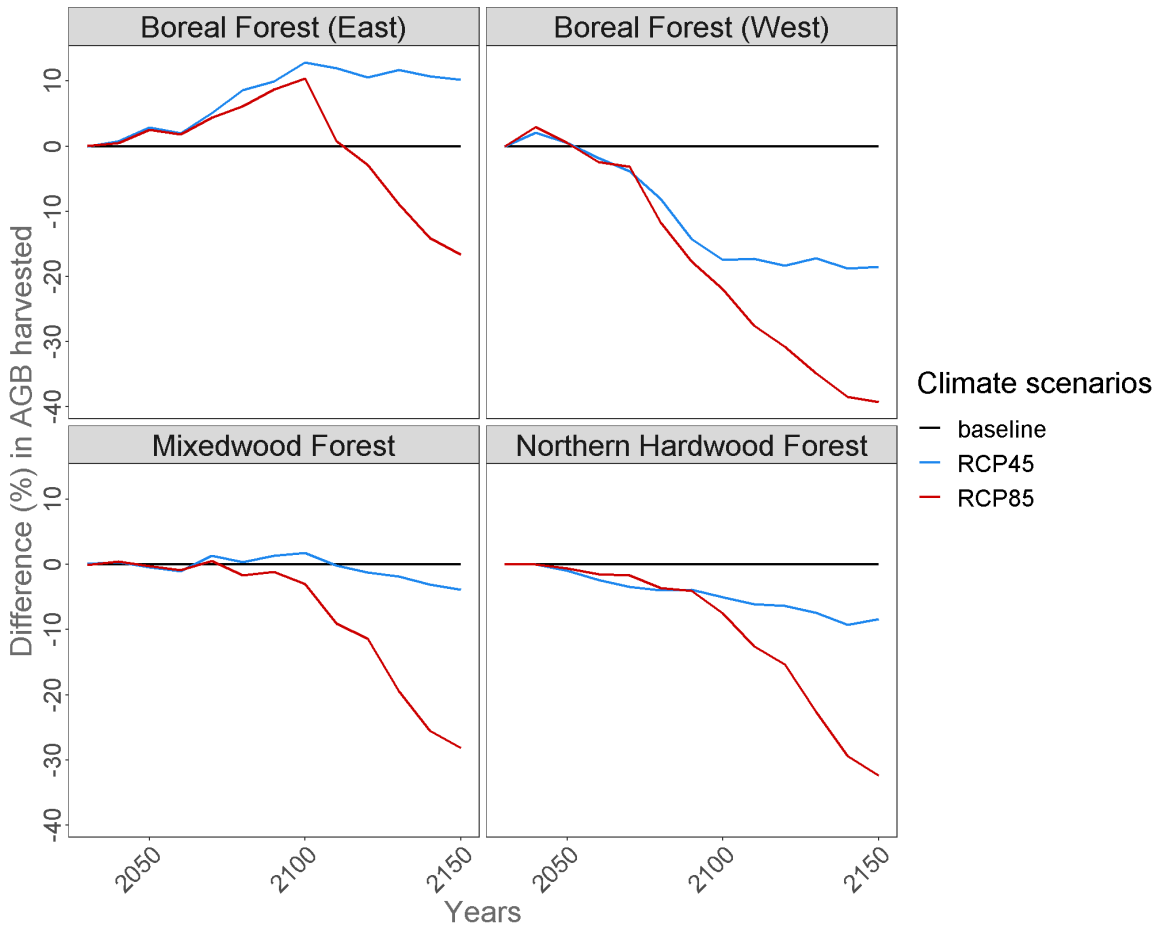

Source: https://www.biorxiv.org/content/10.1101/2020.11.05.370049v1.full.pdf
